# **An Improved Genome Assembly of *Azadirachta indica* A. Juss.**

Neeraja M. Krishnan<sup>1</sup>, Prachi Jain<sup>1</sup>, Saurabh Gupta<sup>1</sup>, Arun K. Hariharan<sup>1</sup> and Binay Panda<sup>1,2\*</sup>

<sup>1</sup>Ganit Labs, Bio-IT Centre, Institute of Bioinformatics and Applied Biotechnology, Biotech Park, Electronics City Phase I, Bangalore 560100, India

<sup>2</sup>Strand Life Sciences, Bellary Road, Hebbal, Bangalore 560024, India

\*Corresponding author: [binay@ganitlabs.in](mailto:binay@ganitlabs.in)

Keywords: PASA, paired-end, mate-pair, *FDFTI*, *SQLE*, Platanus, PacBio, error-correction, LoRDEC, neem, assembly, training-set, gene prediction, gene structure, genome, transcriptome

## 17 **Abstract**

18       Neem (*Azadirachta indica* A. Juss.), an evergreen tree of the *Meliaceae* family, is known for its  
19 medicinal, cosmetic, pesticidal and insecticidal properties. We had previously sequenced and  
20 published the draft genome of the plant, using mainly short read sequencing data. In this report, we  
21 present an improved genome assembly generated using additional short reads from Illumina and  
22 long reads from Pacific Biosciences SMRT sequencer. We assembled short reads and error-  
23 corrected long reads using Platanus, an assembler designed to perform well for heterozygous  
24 genomes. The updated genome assembly (v2.0) yielded 3- and 3.5-fold increase in N50 and N75,  
25 respectively; 2.6-fold decrease in the total number of scaffolds; 1.25-fold increase in the number of  
26 valid transcriptome alignments; 13.4-fold less mis-assembly and 1.85-fold increase in the  
27 percentage repeat, over the earlier assembly (v1.0). The current assembly also maps better to the  
28 genes known to be involved in the terpenoid biosynthesis pathway. Together, the data represents an  
29 improved assembly of the *A. indica* genome.

30       The raw data described in this manuscript are submitted to the NCBI Short Read Archive under  
31 the accession numbers SRX1074131, SRX1074132, SRX1074133, and SRX1074134  
32 (SRP013453).

33

## 34 **Introduction**

35       High-throughput sequencing platforms, especially those based on short-read technology, have  
36 enabled sequencing of many plant genomes (Michael and Jackson, 2013). This has substantially  
37 improved our understanding of genome organization, evolution and complexity in different plant  
38 species. However, most first generation genome assemblies are draft and incomplete assemblies.  
39 The correctness and accuracy of genome assembly depends on the length of the sequencing reads,  
40 errors generated during sequencing and the accuracy of the computational tools (assemblers and  
41 downstream annotation pipelines) used. Additionally, most genome assemblers are not suitable to  
42 assemble genomes of heterozygous plants, a characteristic feature of most plants in the wild

(Kajitani, Toshimoto, et al., 2014). Draft assemblies often bear significant gaps and errors, yielding less accurate gene predictions and annotations. This is compounded by the usage of incomplete training-sets with gene prediction algorithms and absence of a representative transcriptome that can correctly anchor to the genome. Therefore, it is imperative to improve the quality of draft genome assemblies with the help of longer reads using genome assemblers tailored to handle heterozygosity, and make gene predictions using updated training-sets and gene annotations using combinatorial approaches not fully reliant on sequence similarity such as BLAST.

Neem (*Azadirachta indica* A. Juss.), belonging to the order *Rutales*, family *Meliaceae*, is an important woody angiosperm, given its many medicinal and agrochemical uses. We had previously sequenced and reported the draft genome and five organ-specific transcriptomes (Krishnan, Pattnaik, et al., 2011, Krishnan, Pattnaik, et al., 2012) of the neem tree. The neem genome was the 38<sup>th</sup> plant genome to be sequenced (Michael and Jackson, 2013). The genome assembly was generated using short paired-end reads (76 bases or shorter) from Illumina GAIIx with a first generation genome assembler, SOAPdenovo (Li, Zhu, et al., 2010). This was followed by genome annotation and gene prediction analysis, analysis of repeat elements, phylogenetic analysis and gene expression studies (Krishnan, Pattnaik, et al., 2012). In the current report, we have improved the quality of the neem genome assembly by using [a] additional long-insert libraries from Illumina HiSeq, [b] long reads from a third generation sequencer by Pacific Biosciences (PacBio), [c] LoRDEC (Salmela and Rivals, 2014), an algorithm that takes short reads from Illumina and uses those to correct errors in the PacBio reads, and [d] assembling the genome with short and error-corrected long reads using Platanus (Kajitani, Toshimoto, et al., 2014) which is better suited to assemble heterozygous genomes. We re-assembled all five organ-specific RNA libraries into a pooled representative transcriptome, using Trinity (Grabherr, Haas, et al., 2011, Haas, Papanicolaou, et al., 2013), and employed the Program to Assemble Spliced Alignments (PASA, Haas, Delcher, et al., 2003) to benchmark the completeness of previous (v1.0), intermediate, and

current (v2.0) genome assemblies based on their mappability to this transcriptome. We also performed gene prediction analyses with GlimmerHMM (Majoros, Pertea, et al., 2004, v3.0.4) using updated training-sets from Citrus species, which were found to be evolutionarily closer to neem by our earlier phylogenetic analyses (Krishnan, Pattnaik, et al., 2012). Building on our draft assembly, here, we present data on different assembly parameters, accuracy, gaps, gene predictions and the total repeat content as evidence towards an improved neem genome assembly.

## Materials and Methods

### *Assembly*

In addition to the Illumina read libraries used for assembling the previously published draft neem genome (Krishnan, Pattnaik et al. 2012), four more libraries were used for updating the assembly. We included reads from three Illumina mate-pair (with insert sizes 4kb, 6kb and 10kb) and one PacBio (average read length >2kb, varying up to 17.64kb) libraries. Details of all libraries used are presented in Supplementary Table 1.

We pre-processed all the libraries as follows. In the case of Illumina libraries, exact read duplicates were removed using the '*in silico* normalization' utility from Trinity. For PacBio, reads were error-corrected using LoRDEC v0.4.1 based on the two paired-end Illumina libraries (Supplementary Table 1). K-mers ranging from 19 to 36 were tested for error-correction.

We made an effort to assemble intact PacBio reads following error-correction using the PacBioToCA (Koren, Schatz, et al., 2012) pipeline and Celera WGS assembler v7.1 (Myers, Sutton, et al., 2000). However, this process was CPU- and RAM-intensive, and also resulted in a sub-optimal assembly (data not shown). We, therefore, converted the PacBio reads, with and without error-correction, into Illumina-like paired-end reads (read lengths of 100 bases and average insert size of 350 bases) using SInC's read generator (Pattnaik, Gupta, et al., 2014), which could be easily

assembled using SOAPdenovo, SOAPdenovo2 (Luo, Liu, et al., 2012) and Platanus. Converting PacBio reads to Illumina-like reads did not nullify the advantage of the long reads, in terms of contiguity (Supplementary File 1).

We produced 13 intermediate assemblies (Supplementary Table 2) for quality comparison, as follows:

- a) re-assembly of the published version using SOAPdenovo with Illumina short reads (R.S1/v1.0)
- b) assembly using additional Illumina libraries using SOAPdenovo2 (S2.DUP)
- c) assembly of all Illumina duplicate-removed libraries using SOAPdenovo2 (S2)
- d) assembly, using SOAPdenovo2, of all Illumina duplicate-removed libraries along with the error-corrected PacBio reads (S2.ecPB.21 and S2.ecPB.32, using kmers 21 and 32, respectively)
- e) assembly using Platanus of all Illumina duplicate-removed libraries alone (P), or along with either the error-corrected PacBio reads using 19- (P.ecPB.19), 21- (P.ecPB.21), 32- (P.ecPB.32) and 36-mers (P.ecPB.36), or along with uncorrected PacBio reads (P.ucPB)
- f) assembly and gap closing, using Platanus, of all Illumina duplicate-removed libraries and the PacBio library with (P.ecPB.32.gc/v2.0; kmer = 32) or without (P.ucPB.gc) error-correction.

All assembly QCs were performed using QUAST v2.3 (Gurevich, Saveliev, et al., 2013). The assembly NG50 was estimated assuming the neem genome size as 364Mb (Krishnan, Pattnaik, et al., 2012). We refer to the R.S1 assembly as v1.0 (previous) and the P.ecPB.32.gc assembly as the improved v2.0 (current), in our comparisons statistics below.

*Assembly mapping to transcriptome using PASA*

PASA r20140417 was used to compare and evaluate all the assemblies. The representative neem transcriptome was assembled *de novo* using Trinity v2.0.6 with five tissue-specific published RNA-seq libraries. This transcriptome was mapped to various genome assemblies using PASA and the numbers and lengths of valid alignments, failed alignments, and transcript assemblies were compared. In addition, the numbers and lengths of exon-only regions of the valid alignments were also extracted and compared across the assemblies.

### *Gene prediction using GlimmerHMM*

GlimmerHMM was used for benchmarking the assemblies. We created training-sets based on *Citrus sinensis* and *Citrus clementina* (genes.gff3 files downloaded from <http://phytozome.jgi.doe.gov/pz/portal.html>), and used the inbuilt *Arabidopsis thaliana* training-set to predict genes and gene structures in the neem assemblies. Both citrus species were used here since they were found to be the evolutionarily closest to neem, among sequenced species (Krishnan, Pattnaik, et al., 2012).

### *Repeat analyses*

RepeatModeler v1.0.8 (Smit and Hubley, 1989), employing Repeat Scout, Tandem Repeat Finder and Recon modules, was used to construct a library of novel repeats entirely based on the neem genome. Other tools such as LTR\_finder v1.0.5 (Xu and Wang, 2007), TransposonPSI v08222010 (Haas, 2007-10) and MITE-hunter v11-2011 (Han and Wessler, 2010), were used to identify Long Terminal Repeats (LTRs), retro-transposons, and Miniature Inverted repeat Transposable Elements (MITEs), respectively. The neem genome assembly was masked using RepeatMasker v4.0.5 (Smit and Hubley, 1989) with all these repeats and the updated plant (*Viridiplantae*) libraries from Repbase (Kapitonov and Jurka, 2008), to estimate the non-redundant genomic repeat content. This was further classified using the RepeatClassifier module of RepeatModeler.

## 147 *Identification of FDFT1 and SQLE gene structures across assemblies*

148 We obtained the transcript sequences corresponding to *FDFT1* and *SQLE* genes in *C.*  
 149 *clementina* from KEGG (Kanehisa and Goto, 2000; Kanehisa, Goto, et al. 2014), and created a  
 150 database of these sequences using the makeblastdb utility in the BLAST package v2.2.29 (Altschul,  
 151 Gish, et al. 1990). These genes belong to the sesqui- and tri-terpenoid biosynthesis pathways,  
 152 involved in the synthesis of the commercially important compound, azadirachtin, and hence were  
 153 chosen for comparative analyses here. The neem transcriptome was mapped against the database  
 154 using BLAST with an Expect (E) value threshold of 0.001. The mapped neem transcripts were  
 155 traced to their PASA alignments in various genome assemblies. In cases where the identified  
 156 transcripts for the same reference gene aligned to multiple neem scaffolds, consensus exon-intron  
 157 structures were inferred individually for each scaffold, and the one agreeing best with the *C.*  
 158 *clementina* gene structure was considered. The gene structures for all assemblies were plotted along  
 159 with the corresponding gene structure in *C. clementina* using ‘Structure Draw’  
 160 (<http://www.bioinformatics.uni-muenster.de/tools/strdraw/index.hbi>). Regions of gaps (N’s) in the  
 161 assembly were highlighted in red.

162

163 All scripts used in the assembly, QC, evaluation, genome-to-transcriptome mapping, gene  
 164 prediction and repeat analyses pipeline are presented under Supplementary File 2.

165

## 166 **Results**

### 167 *Quality comparison across all versions of neem genome assembly*

168 We compared the correctness and completeness of all the assembly versions based on three  
 169 measures:

- 170 1. Assembly statistics using QUAST
- 171 2. Metrics from transcriptome-to-assembly alignment using PASA
- 172 3. Gene and gene-structure prediction based on three different training-sets using

## GlimmerHMM

The first measure strictly quantifies the completeness of the assembly, while the middle one mainly quantifies the correctness of the assembly, and its completeness to the extent that the draft transcriptome is complete, and the last measure quantifies the completeness of the assembly, but also its correctness, with the assumption that the genes and gene structures in the organisms used as a training-sets are present, as is, in the neem genome. Detailed metrics from all the benchmarking tools are provided in Supplementary Table 2.

### *Comparison of assembly statistics*

Overall, assembly statistics improved with Platanus over SOAPdenovo or SOAPdenovo2 (Figure 1 and Supplementary Table 2), with the best assembly (v2.0) produced by Platanus using a combination of all duplicate-removed Illumina read libraries and error-corrected ( $kmer = 32$ ) PacBio library in all the three stages - assembly, scaffolding and gap-closing. The scaffold numbers and the assembly size here were reduced by 2.6- and 3-fold, respectively, over those from the earlier draft assembly (v1.0; Figure 1). The assembly using uncorrected PacBio reads, in combination with Illumina libraries (P.ucPB), resulted in the longest scaffold (12,211,325 bases). However, other important quality metrics were compromised for this assembly. N50 and N75 were highest for Platanus assembly using all Illumina-only reads (P; 4,002,232 and 1,489,583 bases, respectively). The v2.0 assembly revealed a 13.4-fold reduction in gaps over the v1.0 assembly (an average of 5414.21 Ns per 100kb, Figure 1A) and a 2.26-fold lowered NG50. Incidentally, the NG50 for the Platanus assembly using Illumina-only reads (P; 1,587,838 bases) was comparable to that using SOAPdenovo (v1.0; 1,663,167 bases). Almost 60% of each assembly was covered at 5X when PacBio reads were assembled, along with Illumina read libraries, using SOAPdenovo2 or Platanus (Supplementary Table 2).

### *Comparison of transcriptome-to-genome alignment metrics*

The numbers and cumulative lengths of all valid alignments and PASA assemblies were highest



at 77,635 and 61,292, ~100Mb and ~99Mb, respectively, for the v2.0 assembly (Supplementary Table 2). The cumulative size of valid exonic alignments was also highest at ~48Mb for this assembly, and the corresponding numbers and lengths of all failed alignments were least at 6,584 and ~32Mb, respectively (Supplementary Table 2). The overall valid alignments increased 1.25-fold, and the ones in exons increased by 1.95-fold for the updated (v2.0) assembly over the old one (v1.0) (Figure 1B). Failed alignments went down by 3.5- and 5.9-fold in number and cumulative size, respectively (Figure 1B).

### *Comparison of predicted genes*

We found the highest number of predicted genes and exons, using training-sets from any of the three organisms (*A. thaliana*, *C. sinensis*, *C. clementina*), with the v2.0 assembly (Supplementary Table 2 and Figure 2). The cumulative length of all predicted genes was highest for this assembly (68,723,917 bases) when *A. thaliana* was used as the training-set. When *Citrus* species were used as training-sets, however, the v1.0 assembly resulted in the highest cumulative predicted gene lengths (473,787,912 and 431,305,649 bases, respectively, with *C. sinensis* and *C. clementina*). The predicted gene lengths were comparable between both the assemblies after excluding gaps, suggesting this to be mostly a result of mis-assembly (Figure 2).

We found an abundance of smaller (< 100 bases) mRNAs and exons in gene predictions in the v1.0 assembly, especially with *Citrus* training-sets, which were substantially reduced in the v2.0 assembly (Figure 3). In contrast, the longer mRNAs were more abundant in the latter assembly, with *Citrus* training-sets, an indication of improvement in the assembly.

### *Comparison of gene structures of FDFT1 and SQLE across various assemblies*

In order to demonstrate the biological significance of the improved assembly, we used *FDFT1* and *SQLE* genes, two important genes involved in the sesqui- and tri-terpenoid biosynthesis

pathways. We observed that the gene structures of *FDFT1* and *SQLE* were more complete and accurate in the improved v2.0 assembly when compared to the v1.0 assembly (Figure 4 and Supplementary Figure 2). Using Platanus alone, and augmenting the libraries with additional short Illumina mate-pair libraries yielded a better *FDFT1* gene structure. Similarly, using Platanus as an assembler along with pre-and post- processing yielded a better assembly of the multi-isoform *SQLE* gene.

### *Estimation of repeat content*

The non-redundant repeat content was estimated to be 54,375,206 bases (24.15% of v2.0), which is higher than the 47,427,034 bases reported earlier (13.03% of v1.0). We further classified the repeats into distinct classes, as shown in Supplementary Table 3.

## **Discussion**

Here, we report an improved genome assembly of *A. indica* and provide quantitative evidence on various parameters in support of the improved assembly. The current assembly benefits from using additional Illumina mate-pair reads and long reads from PacBio, a third generation sequencing platform. Additionally, we have used Platanus, a tool designed to assemble heterozygous genomes, such as that of neem (Supplementary Figure 1), better, and an algorithm that uses short reads to correct the errors in long reads. Finally, we have used updated and near complete training-sets from closely related plant species to predict gene structures, and an equally enriched and updated repeat library to predict repeat sequences in the neem genome.

In our study, we employed PASA and GlimmerHMM to benchmark the assemblies, both of which have their limitations in the current context. PASA assumes that the transcriptome is free of mis-assembly errors. The caveat with GlimmerHMM, is that the gaps and errors in the genomic assembly extends to the predictions (Figure 2). We found that the number of gene predictions

decreased across assemblies, post-redundancy removal using cd-HIT-EST (Li and Godzik, 2006). Additionally, the gene predictions are only as good as the training-sets used. Presence of a large number of very short, possibly spurious, exons in the *C. clementina* training-set manifested in a large number of similar predictions in the neem assembly (Figure 3). However, as expected, either these did not align to the neem transcriptome, or a large fraction of those that aligned did not meet the validity criteria set by PASA, suggesting incorrect predictions. This implied a larger number of gene predictions not to be an indicator of correct or complete assembly in neem. Instead, integration of results from multiple tools, preferably using additional information from orthogonal high-throughput platforms such as RNA-seq, and experimental validation, offered better benchmarking.

The presence of duplicate reads may give false assurance to the assembler in terms of artificially inflated read depth. Hence, removing exact read duplicates reduces mis-assemblies. Interestingly, we found that the assembly with SOAPdenovo2, after duplicate removal (S2), displayed worse statistics, but much improved transcriptome-genome mappings using PASA (Supplementary Table 2). SOAPdenovo, using fewer Illumina libraries, and without a duplicate removal step (v1.0), also displayed sub-optimal assembly statistics but a good NG50 number (Figure 1). This, most likely, is due to an abundance of gaps in the assembly, inflating the assembly size. Incidentally, the NG50 numbers for assemblies using libraries from the same platform were comparable (Supplementary Table 2). Such observations caution against deriving conclusions regarding best assembly based solely on assembly statistics tools, such as QUAST.

Exploring the finer details of individual genomic features, instead of macro-level statistics like NG50, may provide a better estimate of the improvement in the assembly quality, as exemplified by the improved assembly of *FDFT1* and *SQLE* genes in the improved neem assembly. Relying solely on sequence similarity-based approaches for gene identification can result in incomplete and/or inaccurate structural annotations. Using BLAST against *C. clementina* transcripts, with a stringent

277 *E*-value threshold of 0.001, identified only portions of the *FDFTI* and *SQLE* genes in our scaffolds,  
 278 making us falsely deduce that we had assembled only certain exons from these genes. This would  
 279 particularly be true for structurally conserved genes, which have few very important, and, therefore,  
 280 conserved domains. In such genes, variable domains might not have significant sequence homology  
 281 to the reference database(s) that include sequences from other species, causing the genes to not be  
 282 annotated in their entirety. Therefore, our approach, of using the sequence similarity between *C.*  
 283 *clementina* and neem transcripts to trace back the entire gene sequence, structure and combining  
 284 both reference- and *de novo*-based identification techniques, is a better one (Figure 4).

285

286 In conclusion, genome assemblies need to be updated continuously by implementing accurate  
 287 computational algorithms and supplementing with experimental evidence to obtain error-free and  
 288 near complete assemblies. The process of obtaining accurate genome assembly is a dynamic and  
 289 continuous process that needs to be undertaken, in our opinion, by groups or communities that have  
 290 produced the first draft sequence of various genomes. This will facilitate research in genomics and  
 291 create public resources to understand gene structure and function in plants better.

292

## 293 **Acknowledgements**

294 Research presented in this article is funded by Department of Electronics and Information  
 295 Technology, Government of India (Ref No:18(4)/2010-E-Infra., 31-03-2010) and Department of IT,  
 296 BT and ST, Government of Karnataka, India (Ref No:3451-00-090-2-22).

297

## 298 **Author Contributions**

299 BP: Overall planning, conception and design of the study, data interpretation and manuscript  
 300 writing; NMK: Conception, analysis and interpretation of data, manuscript writing; PJ and SG:  
 301 Analysis and interpretation of data, manuscript writing; and AKH: Sequencing data production.

302

## References

- Altschul, S.F., W. Gish, W. Miller, E.W. Myers, and D.J. Lipman. 1990. Basic local alignment search tool. *J. Mol. Biol.* 215:403-410.
- Grabherr, M.G., B.J. Haas, M. Yassour, J.Z. Levin, D.A. Thompson, I. Amit, et al. 2011. Full-length transcriptome assembly from RNA-Seq data without a reference genome. *Nature biotechnology* 29: 644-652. doi:10.1038/nbt.1883.
- Gurevich, A., V. Saveliev, N. Vyahhi and G. Tesler. 2013. QUAST: quality assessment tool for genome assemblies. *Bioinformatics* 29: 1072-1075. doi:10.1093/bioinformatics/btt086.
- Haas, B. 2007-10. TransposonPSI.
- Haas, B.J., A.L. Delcher, S.M. Mount, J.R. Wortman, R.K. Smith, Jr., L.I. Hannick, et al. 2003. Improving the Arabidopsis genome annotation using maximal transcript alignment assemblies. *Nucleic acids research* 31: 5654-5666.
- Haas, B.J., A. Papanicolaou, M. Yassour, M. Grabherr, P.D. Blood, J. Bowden, et al. 2013. De novo transcript sequence reconstruction from RNA-seq using the Trinity platform for reference generation and analysis. *Nature protocols* 8: 1494-1512. doi:10.1038/nprot.2013.084.
- Han, Y. and S.R. Wessler. 2010. MITE-Hunter: a program for discovering miniature inverted-repeat transposable elements from genomic sequences. *Nucleic acids research* 38: e199. doi:10.1093/nar/gkq862.
- Kajitani, R., K. Toshimoto, H. Noguchi, A. Toyoda, Y. Ogura, M. Okuno, et al. 2014. Efficient de novo assembly of highly heterozygous genomes from whole-genome shotgun short reads. *Genome research* 24: 1384-1395. doi:10.1101/gr.170720.113.
- Kanehisa, M., S. Goto, Y. Sato, M. Kawashima, M. Furumichi, and M. Tanabe. 2014. Data, information, knowledge and principle: back to metabolism in KEGG. *Nucleic Acids Res.* 42: D199–D205.
- Kanehisa, M. and S. Goto. 2000. KEGG: Kyoto Encyclopedia of Genes and Genomes. *Nucleic Acids Res.* 28: 27-30.

329 Kapitonov, V.V. and J. Jurka. 2008. A universal classification of eukaryotic transposable elements  
330 implemented in Repbase. Nature reviews. Genetics 9: 411-412; author reply 414.  
331 doi:10.1038/nrg2165-c1.

332 Koren, S., M.C. Schatz, B.P. Walenz, J. Martin, J.T. Howard, G. Ganapathy, et al. 2012. Hybrid  
333 error correction and de novo assembly of single-molecule sequencing reads. Nature  
334 biotechnology 30: 693-700. doi:10.1038/nbt.2280.

335 Krishnan, N.M., S. Pattnaik, S.A. Deepak, A.K. Hariharan, P. Gaur, R. Chaudhary, et al. 2011. De  
336 novo sequencing and assembly of *Azadirachta indica* fruit transcriptome. . Curr Sci (India)  
337 101: 9.

338 Krishnan, N.M., S. Pattnaik, P. Jain, P. Gaur, R. Choudhary, S. Vaidyanathan, et al. 2012. A Draft  
339 of the Genome and Four Transcriptomes of a Medicinal and Pesticidal Angiosperm  
340 *Azadirachta indica*. BMC genomics 13: 464. doi:10.1186/1471-2164-13-464.

341 Kurtz, B. 2014. Vmatch (<http://www.vmatch.de>).

342 Li, R., H. Zhu, J. Ruan, W. Qian, X. Fang, Z. Shi, et al. 2010. De novo assembly of human genomes  
343 with massively parallel short read sequencing. Genome research 20: 265-272.  
344 doi:10.1101/gr.097261.109.

345 Li, W. and A. Godzik. 2006. Cd-hit: a fast program for clustering and comparing large sets of  
346 protein or nucleotide sequences. Bioinformatics 22:1658-1659.

347 Luo, R., B. Liu, Y. Xie, Z. Li, W. Huang, J. Yuan, et al. 2012. SOAPdenovo2: an empirically  
348 improved memory-efficient short-read de novo assembler. GigaScience 1: 18.  
349 doi:10.1186/2047-217X-1-18.

350 Majoros, W.H., M. Pertea and S.L. Salzberg. 2004. TigrScan and GlimmerHMM: two open source  
351 ab initio eukaryotic gene-finders. Bioinformatics 20: 2878-2879.  
352 doi:10.1093/bioinformatics/bth315.

353 Michael, T.P. and S. Jackson. 2013. The First 50 Plant Genomes. The Plant Genome 6: 7.  
354 doi:10.3835/plantgenome2013.03.0001in.

355 Myers, E.W., G.G. Sutton, A.L. Delcher, I.M. Dew, D.P. Fasulo, M.J. Flanigan, S.A. Kravitz, C.M.  
356 Mobarry, K.H. Reinert, K.A. Remington, E.L. Anson, R.A. Bolanos, H.H. Chou, C.M.  
357 Jordan, A.L. Halpern, S. Lonardi, E.M. Beasley, R.C. Brandon, L. Chen, P.J. Dunn, Z. Lai, Y.  
358 Liang, D.R. Nusskern, M. Zhan, Q. Zhang, X. Zheng, G.M. Rubin, M.D. Adams and J.C.  
359 Venter. 2000. A Whole-Genome Assembly of *Drosophila*. *Science* 287 2196-2204.

360 Pattnaik, S., S. Gupta, A.A. Rao and B. Panda. 2014. SInC: an accurate and fast error-model based  
361 simulator for SNPs, Indels and CNVs coupled with a read generator for short-read sequence  
362 data. *BMC bioinformatics* 15: 40. doi:10.1186/1471-2105-15-40.

363 Salmela, L. and E. Rivals. 2014. LoRDEC: accurate and efficient long read error correction.  
364 *Bioinformatics* 30: 3506-3514. doi:10.1093/bioinformatics/btu538.

365 Smit, A.F.A. and R. Hubley. 1989. Repeat Masker.

366 Smit, A.F.A. and R. Hubley. 1989. Repeat Modeller.

367 Xu, Z. and H. Wang. 2007. LTR\_FINDER: an efficient tool for the prediction of full-length LTR  
368 retrotransposons. *Nucleic acids research* 35: W265-268. doi:10.1093/nar/gkm286.

369

370

## 371 **Figure Legends**

372 Figure 1. Improvements (fold change between current, v2.0, over the previous, v1.0, assembly) in  
373 various A: assembly statistics and B: PASA mapping statistics. The Y-axis is plotted on a  
374 logarithmic scale and the minor grids conform to uniform intervals on positive and negative Y axis.

375  
376 Figure 2. Improvements (fold change between current, v2.0, over the previous, v1.0, assembly) in  
377 the numbers (#s) and sizes (bases) of gene and exon predictions from GlimmerHMM. The Y-axis is  
378 plotted on a logarithmic scale and the minor grids conform to uniform intervals on positive and  
379 negative Y axis.

380  
381 Figure 3. Proportion (%) of gene-bearing scaffolds/contigs with gene predictions of lengths <10  
382 bases, 10-100 bases, and >100 bases, for *A. thaliana*, *C. sinensis* and *C. clementina* training sets.

383  
384 Figure 4. Comparison of v1.0 and v2.0 assemblies for A: *FDFT1* and B: *SQLE* genes. The *FDFT1*  
385 and *SQLE* transcripts from *C. clementina* were mapped to the representative Trinity-assembled *A.*  
386 *indica* transcriptome using NCBI BLAST (*E*-value 0.001). The transcripts were traced to their neem  
387 genomic scaffold mappings from PASA, in order to extract the exon-intron structures of the  
388 corresponding genes. In the figures, boxes and lines denote exons and introns, respectively, and the  
389 red regions denote gaps in the assemblies. The scales are different for *FDFT1* and *SQLE* and are,  
390 therefore, indicated individually.

## 391 **Supplementary Figure Legends**

392  
393 Supplementary Figure 1. kmer frequency curve. The frequency (%) of 17-mers is plotted as a  
394 function of the number of times they occur across paired-end libraries. The peaks for heterozygous,  
395 homozygous and repetitive kmers are highlighted by arrows.

396



397 Supplementary Figure 2. Comparison across assemblies for A: *FDFT1* and B: *SQLE* genes. The  
 398 *FDFT1* and *SQLE* transcripts from *C. clementina* were mapped to the representative Trinity-  
 399 assembled *A. indica* transcriptome using NCBI BLAST (*E*-value 0.001). The transcripts were traced  
 400 to their neem genomic scaffold mappings from PASA, in order to extract the exon-intron structures  
 401 of the corresponding genes. In the figures, boxes and lines denote exons and introns, respectively,  
 402 and the red regions denote gaps in the assemblies. The scales are different for *FDFT1* and *SQLE*  
 403 and are, therefore, indicated individually.

A

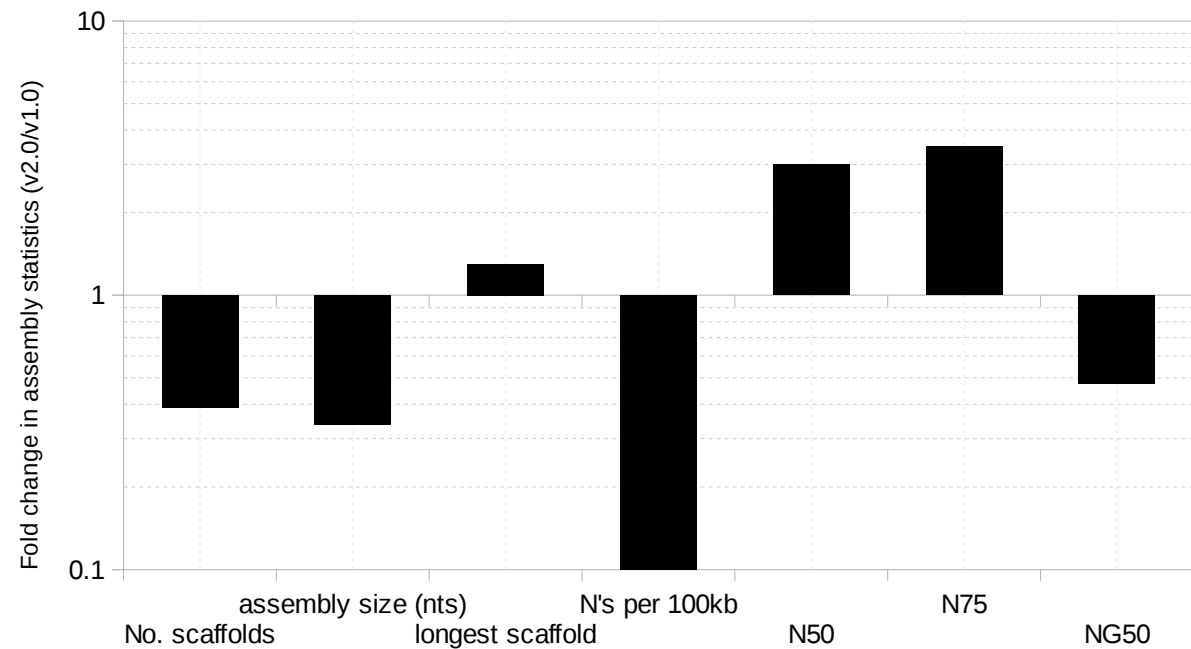

B

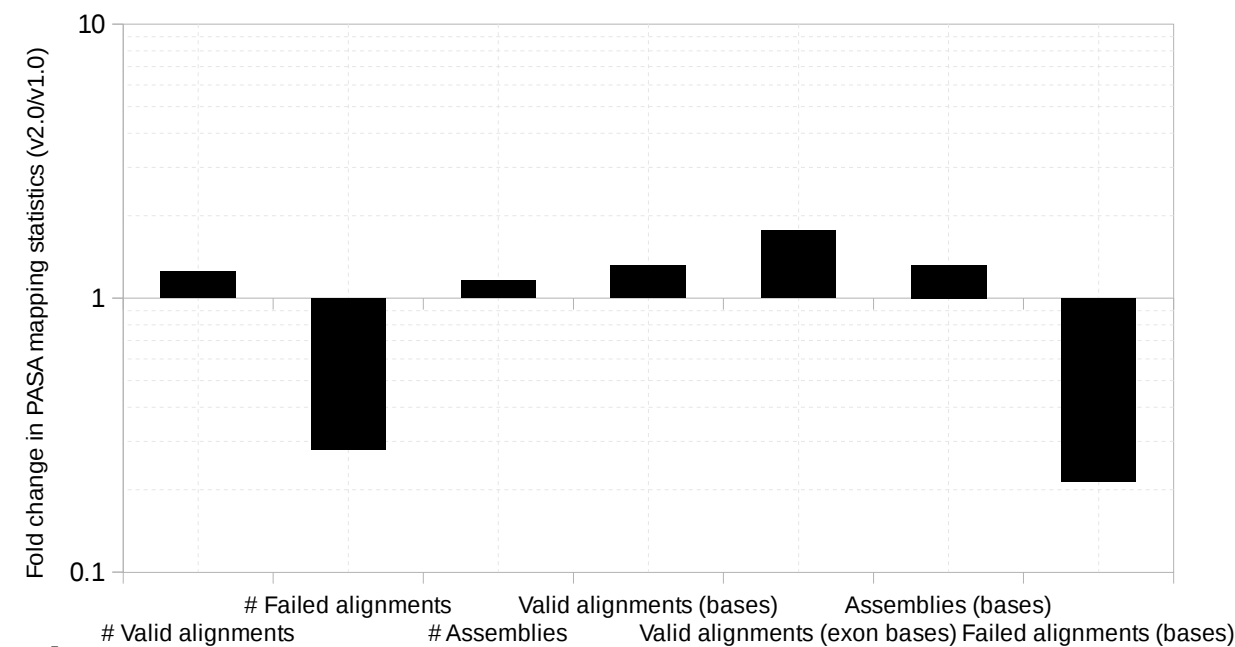**Figure 1**

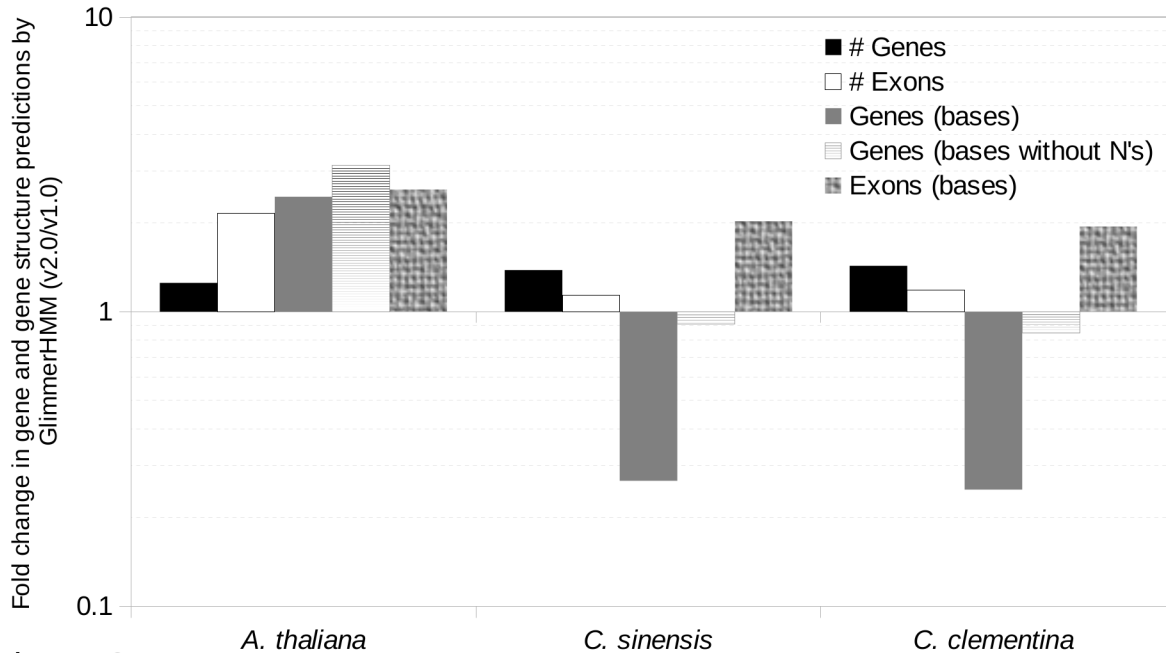

Figure 2

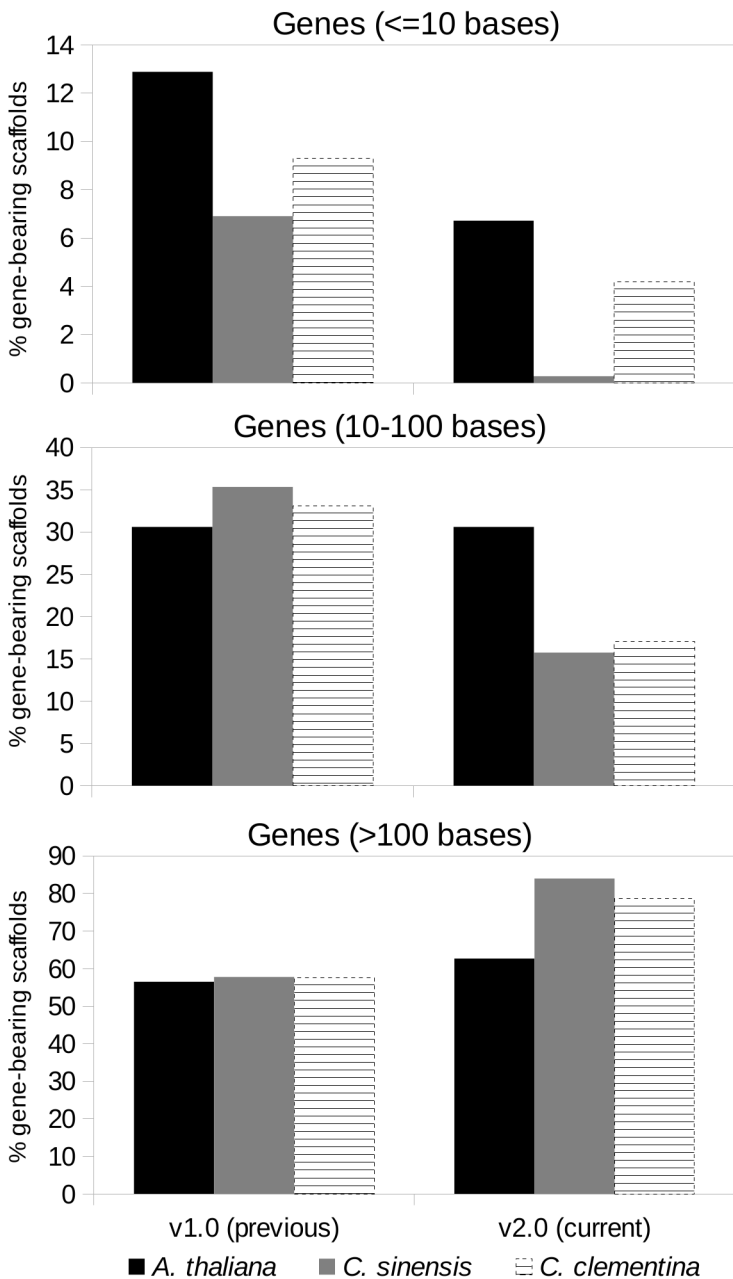

**Figure 3**

**A**

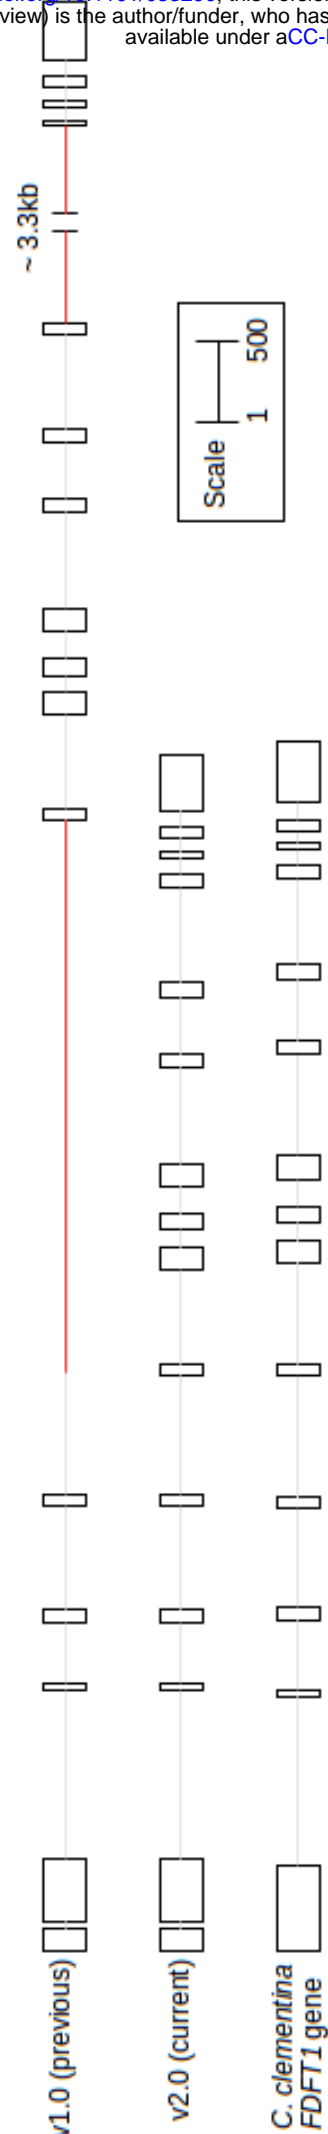

**B**

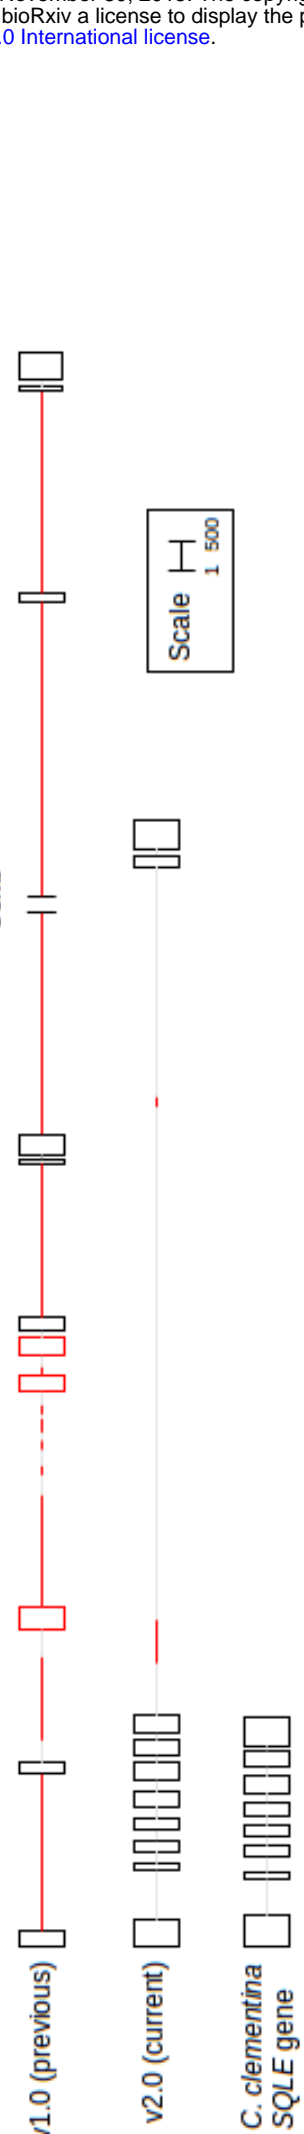

**Figure 4**

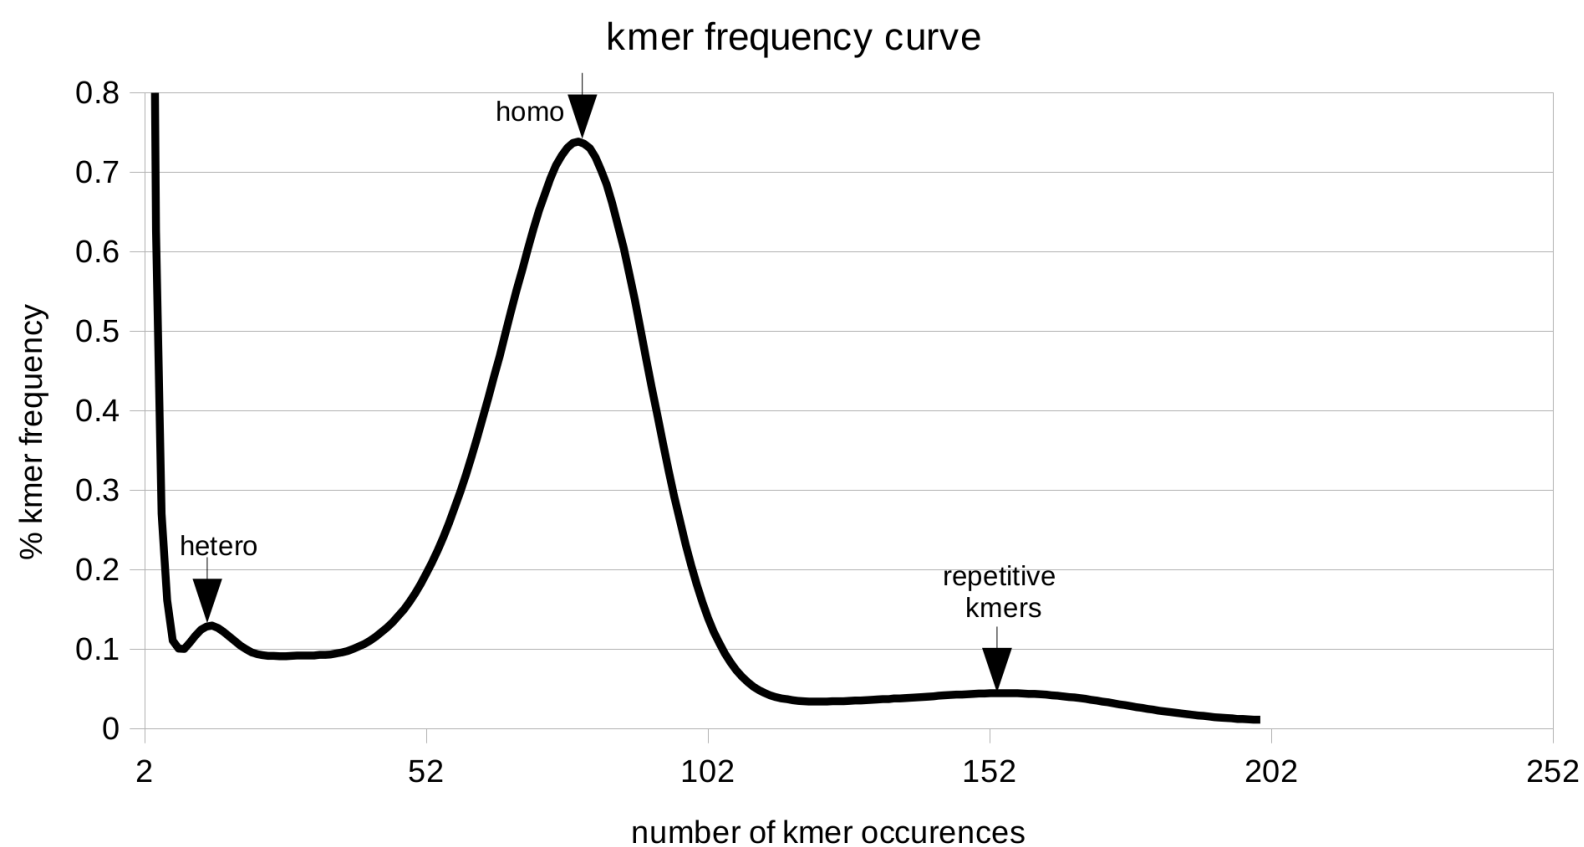

Supplementary Figure 1

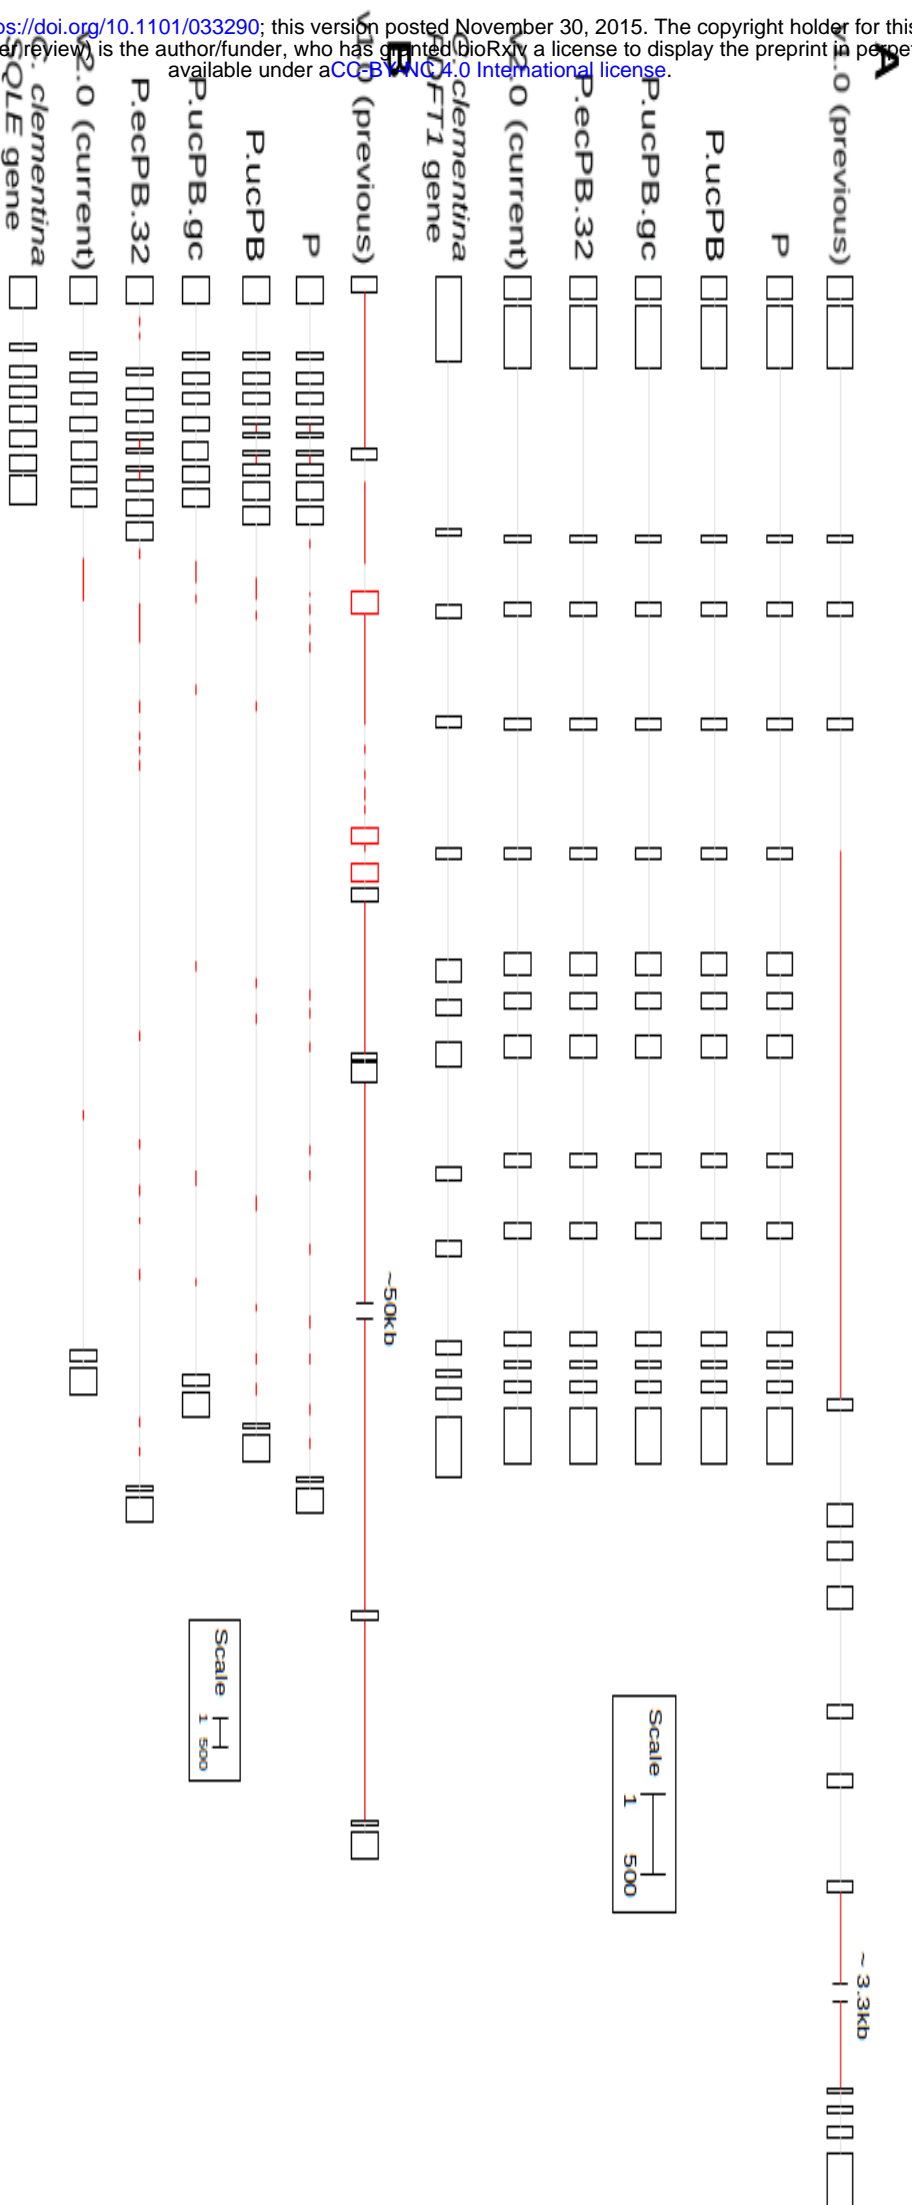

**Supplementary Figure 2**

**Supplementary Table 1. Details of sequencing libraries. PE: short-insert paired end, MP: long-insert mate pair libraries.**

| Lib no. | Read length                             | Insert size | Type        | Used for earlier published assembly (v1.0)* using SOAPdenovo | Used for v2.0 and intermediate assemblies |
|---------|-----------------------------------------|-------------|-------------|--------------------------------------------------------------|-------------------------------------------|
| 1       | 76                                      | 350         | Illumina PE | ✓                                                            | ✓                                         |
| 2       | 76                                      | 350         | Illumina PE | ✓                                                            | ✓                                         |
| 3       | 36                                      | 1500        | Illumina MP | ✓                                                            | ✓                                         |
| 4       | 36                                      | 3000        | Illumina MP | ✓                                                            | ✓                                         |
| 5       | 36                                      | 10000       | Illumina MP | ✓                                                            | ✓                                         |
| 6       | 100                                     | 4000        | Illumina MP |                                                              | ✓                                         |
| 7       | 100                                     | 6000        | Illumina MP |                                                              | ✓                                         |
| 8       | 100                                     | 10000       | Illumina MP |                                                              | ✓                                         |
| 9       | Variable (mean >2Kbp, longest 17.64Kbp) | NA          | PacBio      |                                                              | ✓                                         |

\* The original assembly contained both Ion Torrent and Sanger libraries with very low coverage (0.5X and 0.001X, respectively) which were excluded from our current assembly.



# Supplementary File 1.

NUCMER based mapping of smaller Illumina reads coming from a single long PacBio read, to the assembly.

NUCMER (Read 1)

| [S1]                                                                                 | [E1]                                | [S2] | [E2] | [LEN 1] | [LEN 2] | [% IDY] | [TAGS] |        |  |
|--------------------------------------------------------------------------------------|-------------------------------------|------|------|---------|---------|---------|--------|--------|--|
| 22                                                                                   | 100                                 | 726  | 648  | 79      | 79      | 100.00  |        |        |  |
| m121022_124828_42181_c100388272550000001523034010251242_s1_p0/7/0_806_190_681_12_1_0 | scaffold24417_len726_cov2219_single | 1    | 100  | 712     | 613     | 100     | 100    | 100.00 |  |
| m121022_124828_42181_c100388272550000001523034010251242_s1_p0/7/0_806_225_666_14_1_0 | scaffold24417_len726_cov2219_single | 1    | 100  | 693     | 594     | 100     | 100    | 100.00 |  |
| m121022_124828_42181_c100388272550000001523034010251242_s1_p0/7/0_806_244_671_22_1_0 | scaffold24417_len726_cov2219_single | 10   | 87   | 78      | 1       | 78      | 78     | 100.00 |  |
| m121022_124828_42181_c100388272550000001523034010251242_s1_p0/7/0_806_55_488_4_1_0   | scaffold23831_len619_cov1962_single |      |      |         |         |         |        |        |  |

NUCMER (Read 2)

| [S1]                                                                                 | [E1]                                | [S2] | [E2] | [LEN 1] | [LEN 2] | [% IDY] | [TAGS] |        |  |
|--------------------------------------------------------------------------------------|-------------------------------------|------|------|---------|---------|---------|--------|--------|--|
| 1                                                                                    | 100                                 | 306  | 405  | 100     | 100     | 100.00  |        |        |  |
| m121022_124828_42181_c100388272550000001523034010251242_s1_p0/7/0_806_106_532_11_1_1 | scaffold24417_len726_cov2219_single | 1    | 100  | 276     | 375     | 100     | 100    | 100.00 |  |
| m121022_124828_42181_c100388272550000001523034010251242_s1_p0/7/0_806_111_562_6_1_1  | scaffold24417_len726_cov2219_single | 1    | 100  | 260     | 359     | 100     | 100    | 100.00 |  |
| m121022_124828_42181_c100388272550000001523034010251242_s1_p0/7/0_806_134_578_2_1_1  | scaffold24417_len726_cov2219_single | 1    | 100  | 235     | 334     | 100     | 100    | 100.00 |  |
| m121022_124828_42181_c100388272550000001523034010251242_s1_p0/7/0_806_140_603_15_1_1 | scaffold24417_len726_cov2219_single | 1    | 100  | 232     | 331     | 100     | 100    | 100.00 |  |
| m121022_124828_42181_c100388272550000001523034010251242_s1_p0/7/0_806_146_606_19_1_1 | scaffold24417_len726_cov2219_single | 1    | 100  | 157     | 256     | 100     | 100    | 100.00 |  |
| m121022_124828_42181_c100388272550000001523034010251242_s1_p0/7/0_806_190_681_12_1_1 | scaffold24417_len726_cov2219_single | 1    | 100  | 172     | 271     | 100     | 100    | 100.00 |  |
| m121022_124828_42181_c100388272550000001523034010251242_s1_p0/7/0_806_225_666_14_1_1 | scaffold24417_len726_cov2219_single | 1    | 100  | 349     | 448     | 100     | 100    | 100.00 |  |
| m121022_124828_42181_c100388272550000001523034010251242_s1_p0/7/0_806_22_489_25_1_1  | scaffold24417_len726_cov2219_single | 1    | 100  | 167     | 266     | 100     | 100    | 100.00 |  |

```

m121022_124828_42181_c100388272550000001523034010251242_s1_p0/7/0_806_244_671_22
_1_1 scaffold24417_len726_cov2219_single
1 100 | 356 455 | 100 100 | 100.00 |
m121022_124828_42181_c100388272550000001523034010251242_s1_p0/7/0_806_2_482_17_1
_1 scaffold24417_len726_cov2219_single
1 100 | 350 449 | 100 100 | 100.00 |
m121022_124828_42181_c100388272550000001523034010251242_s1_p0/7/0_806_55_488_4_1
_1 scaffold24417_len726_cov2219_single
1 100 | 311 410 | 100 100 | 100.00 |
m121022_124828_42181_c100388272550000001523034010251242_s1_p0/7/0_806_65_527_8_1
_1 scaffold24417_len726_cov2219_single

```

| abbreviation        | assembler   | library type                                 | QUAST          |                     |                  |               |         |
|---------------------|-------------|----------------------------------------------|----------------|---------------------|------------------|---------------|---------|
|                     |             |                                              | # of scaffolds | assembly size (nts) | longest scaffold | N's per 100kb | N50     |
| R.S1 (v1.0)         | soapdenovo  | illumina (wo dupRem) reassembled             | 65735          | 669685450           | 6070869          | 72683.84      | 879363  |
| P.ecPB.32.gc (v2.0) | platanus    | illumina (dupRem) + ec (32) pacbio (5X) + gc | 25560          | 225115251           | 7894471          | 5414.21       | 2629187 |
| S2.DUP              | soapdenovo2 | illumina (wo dupRem)                         | 107964         | 449656122           | 7814495          | 31319.29      | 557365  |
| S2                  | soapdenovo2 | illumina (dupRem)                            | 110581         | 344150202           | 6186666          | 32999.82      | 580956  |
| S2.ecPB.21          | soapdenovo2 | illumina (dupRem) + ec (21) pacbio (5X)      | 578405         | 241236331           | 20326            | 19079.17      | 1388    |
| S2.ecPB.32          | soapdenovo2 | illumina (dupRem) + ec (32) pacbio (5X)      | 567634         | 236057722           | 20326            | 15290.74      | 1325    |
| P                   | platanus    | illumina (dupRem)                            | 35075          | 250268532           | 10980712         | 15531.55      | 4002232 |
| P.ecPB.19           | platanus    | illumina (dupRem) + ec (19) pacbio (5X)      | 24458          | 247175992           | 7115459          | 14799.02      | 2264224 |
| P.ecPB.21           | platanus    | illumina (dupRem) + ec (21) pacbio (5X)      | 24750          | 250209332           | 8603192          | 16201         | 2902226 |
| P.ecPB.32           | platanus    | illumina (dupRem) + ec (32) pacbio (5X)      | 25560          | 243319034           | 8307765          | 13435.44      | 2889126 |
| P.ecPB.36           | platanus    | illumina (dupRem) + ec (36) pacbio (5X)      | 21743          | 246909418           | 8609061          | 15312.29      | 2044474 |
| P.ucPB              | platanus    | illumina (dupRem) + pacbio (5X)              | 68309          | 246188646           | 12211325         | 12200.65      | 3137410 |
| P.ucPB.gc           | platanus    | illumina (dupRem) + pacbio (5X) + gc         | 68309          | 239373060           | 11935676         | 9428.23       | 3044020 |

|         |                            | NG50 (364 mb) | % covered<br>at 5X | % covered<br>at 10X | PASA (#s)           |                      |                | PASA (Lengths)      |                   |            | PASA (Exon<br>Lengths) |
|---------|----------------------------|---------------|--------------------|---------------------|---------------------|----------------------|----------------|---------------------|-------------------|------------|------------------------|
| N75     | assembly size<br>(no gaps) |               |                    |                     | Valid<br>alignments | Failed<br>alignments | Assemblie<br>s | Valid<br>alignments | Failed alignments | Assemblies | Valid<br>alignments    |
| 329406  | 182932349                  | 1663167       | 13.66              | 6.83                | 61991               | 23523                | 52924          | 75719343            | 190033044         | 74739553   | 24479791               |
| 1149129 | 213036786                  | 734691        | 65.50              | 32.75               | 77635               | 6584                 | 61292          | 99453593            | 32030331          | 98694338   | 47829727               |
| 181445  | 308827017.1                | 836066        | 37.41              | 18.71               | 40416               | 43883                | 35880          | 21118152            | 214585399         | 20954880   | 9219905                |
| 194116  | 230581254.8                | 681660        | 32.88              | 16.44               | 72582               | 10851                | 58508          | 53795060            | 120907710         | 53154195   | 22605627               |
| 837     | 195210441.3                | 290           | 60.95              | 30.47               | 40082               | 26780                | 34723          | 11708648            | 13883902          | 11566814   | 9821552                |
| 821     | 199962749.5                | 270           | 62.38              | 31.19               | 40226               | 25494                | 34769          | 11794632            | 13941208          | 11647110   | 9899586                |
| 1489583 | 211397949.8                | 1587838       | 45.22              | 22.61               | 73800               | 11324                | 59057          | 85780130            | 53260936          | 85251475   | 41362113               |
| 876306  | 210596367.5                | 958049        | 59.64              | 29.82               | 70309               | 14030                | 56274          | 80711062            | 60735939          | 80164716   | 38639958               |
| 986022  | 209672918.1                | 1175333       | 58.76              | 29.38               | 69116               | 15189                | 55456          | 77277179            | 68307801          | 76849819   | 37102672               |
| 1243543 | 210628051.2                | 1112734       | 60.52              | 30.26               | 74576               | 8833                 | 59412          | 91112744            | 40801767          | 90400020   | 43230588               |
| 973439  | 209101931.9                | 1030861       | 59.72              | 29.86               | 65304               | 19054                | 52778          | 66319838            | 80933035          | 65982106   | 31721203               |
| 1274166 | 216152031                  | 1270061       | 60.16              | 30.08               | 73763               | 9728                 | 58895          | 86665009            | 44526788          | 85994624   | 41389567               |
| 1252388 | 216804417.3                | 646875        | 61.87              | 30.94               | 73855               | 10533                | 58699          | 88744677            | 50211652          | 88084027   | 42629241               |

| abbreviation        |                 |        |                      |          | predicted length = 1 nucleotide |       |                      |       |           |        |         |
|---------------------|-----------------|--------|----------------------|----------|---------------------------------|-------|----------------------|-------|-----------|--------|---------|
|                     | GlimmerHMM (#s) |        | GlimmerHMM (Lengths) |          | GlimmerHMM (#s)                 |       | GlimmerHMM (Lengths) |       | PASA (#s) |        | PASA (I |
|                     | Genes           | Exons  | Genes                | Exons    | Genes                           | Exons | Genes                | Exons | Valid     | Failed | Valid   |
| R.S1 (v1.0)         | 22816           | 59432  | 27884404             | 11837318 | 0                               | 3     | 0                    | 3     | 0         | 0      | 0       |
| P.ecPB.32.gc (v2.0) | 28553           | 128053 | 68723917             | 30727025 | 0                               | 13    | 0                    | 13    | 2         | 1      | 2       |
| S2.DUP              | 34484           | 102919 | 54852164             | 20474483 | 0                               | 12    | 0                    | 12    | 1         | 9      | 1       |
| S2                  | 32304           | 108656 | 60771387             | 23656610 | 0                               | 5     | 0                    | 5     | 1         | 2      | 1       |
| S2.ecPB.21          | 59707           | 90723  | 25691472             | 18635045 | 0                               | 2     | 0                    | 2     | 0         | 0      | 0       |
| S2.ecPB.32          | 60610           | 92091  | 26159705             | 19002432 | 0                               | 1     | 0                    | 1     | 0         | 0      | 0       |
| P                   | 25707           | 112438 | 60757663             | 25795802 | 0                               | 9     | 0                    | 9     | 2         | 2      | 2       |
| P.ecPB.19           | 26159           | 114069 | 62047674             | 26457349 | 0                               | 5     | 0                    | 5     | 2         | 1      | 2       |
| P.ecPB.21           | 25694           | 112341 | 60941486             | 25691804 | 0                               | 13    | 0                    | 13    | 2         | 6      | 2       |
| P.ecPB.32           | 25863           | 115978 | 62504333             | 26766180 | 0                               | 13    | 0                    | 13    | 4         | 1      | 4       |
| P.ecPB.36           | 24954           | 109392 | 58493707             | 23706845 | 0                               | 7     | 0                    | 7     | 1         | 2      | 1       |
| P.ucPB              | 25911           | 115639 | 62033977             | 26174038 | 0                               | 14    | 0                    | 14    | 4         | 3      | 4       |
| P.ucPB.gc           | 27356           | 121406 | 65264827             | 28187804 | 0                               | 10    | 0                    | 10    | 4         | 2      | 4       |

|          | predicted length <= 10 nucleotide |       |                      |       |           |        |                |        |                 |       |           |
|----------|-----------------------------------|-------|----------------------|-------|-----------|--------|----------------|--------|-----------------|-------|-----------|
| Lengths) | GlimmerHMM (#s)                   |       | GlimmerHMM (Lengths) |       | PASA (#s) |        | PASA (Lengths) |        | GlimmerHMM (#s) |       | GlimmerHM |
| Failed   | Genes                             | Exons | Genes                | Exons | Valid     | Failed | Valid          | Failed | Genes           | Exons | Genes     |
| 0        | 553                               | 2012  | 3269                 | 12424 | 451       | 724    | 2872           | 4524   | 1308            | 9296  | 22679     |
| 1        | 98                                | 1599  | 673                  | 9985  | 534       | 151    | 3351           | 965    | 286             | 11559 | 6071      |
| 9        | 526                               | 2280  | 3066                 | 14448 | 180       | 885    | 1188           | 5771   | 1349            | 13925 | 23681     |
| 2        | 522                               | 2145  | 3051                 | 13350 | 345       | 526    | 2169           | 3390   | 1311            | 12662 | 23602     |
| 0        | 1745                              | 2232  | 10644                | 13682 | 90        | 128    | 588            | 801    | 7585            | 12001 | 181203    |
| 0        | 1721                              | 2214  | 10485                | 13566 | 97        | 115    | 632            | 732    | 7635            | 12062 | 183275    |
| 2        | 211                               | 1682  | 1251                 | 10462 | 497       | 234    | 3176           | 1543   | 501             | 10644 | 8613      |
| 1        | 132                               | 1612  | 760                  | 9953  | 430       | 333    | 2711           | 2106   | 334             | 10414 | 6347      |
| 6        | 116                               | 1584  | 682                  | 9828  | 450       | 344    | 2782           | 2152   | 313             | 10314 | 5886      |
| 1        | 136                               | 1572  | 812                  | 9792  | 480       | 186    | 2993           | 1235   | 343             | 10715 | 6130      |
| 2        | 156                               | 1667  | 890                  | 10488 | 430       | 425    | 2708           | 2787   | 351             | 10949 | 5802      |
| 3        | 127                               | 1646  | 778                  | 10306 | 493       | 257    | 3070           | 1656   | 317             | 10986 | 5550      |
| 2        | 67                                | 1602  | 381                  | 9969  | 486       | 247    | 3026           | 1538   | 245             | 11165 | 5284      |

| predicted length <= 50 nucleotide |           |        |                |        | predicted length <= 100 nucleotide |       |                      |         |           |        |                |         |
|-----------------------------------|-----------|--------|----------------|--------|------------------------------------|-------|----------------------|---------|-----------|--------|----------------|---------|
| IM (Lengths)                      | PASA (#s) |        | PASA (Lengths) |        | GlimmerHMM (#s)                    |       | GlimmerHMM (Lengths) |         | PASA (#s) |        | PASA (Lengths) |         |
| Exons                             | Valid     | Failed | Valid          | Failed | Genes                              | Exons | Genes                | Exons   | Valid     | Failed | Valid          | Failed  |
| 233878                            | 3019      | 3875   | 84914          | 102181 | 1875                               | 23993 | 65004                | 1352381 | 9540      | 11079  | 582283         | 651332  |
| 346117                            | 5825      | 1210   | 195579         | 36596  | 478                                | 45725 | 20609                | 2959090 | 31051     | 5248   | 2133009        | 345098  |
| 384755                            | 1529      | 7424   | 46934          | 223183 | 1925                               | 40351 | 66008                | 2386791 | 5753      | 26156  | 369403         | 1646989 |
| 351635                            | 3358      | 4682   | 106802         | 142899 | 1957                               | 40903 | 71841                | 2497568 | 14455     | 18716  | 954945         | 1214213 |
| 319161                            | 962       | 1143   | 30716          | 36185  | 15636                              | 34432 | 793299               | 2036255 | 4417      | 5570   | 297024         | 379502  |
| 321267                            | 950       | 1156   | 30010          | 37114  | 15752                              | 34772 | 800883               | 2060085 | 4389      | 5650   | 295320         | 385927  |
| 311165                            | 5117      | 1906   | 169515         | 57635  | 676                                | 40990 | 21659                | 2632658 | 26056     | 8056   | 1776258        | 528900  |
| 306500                            | 4761      | 2398   | 159521         | 72508  | 486                                | 40778 | 18170                | 2631236 | 24833     | 10141  | 1701956        | 664971  |
| 303668                            | 4646      | 2621   | 153767         | 79546  | 449                                | 40713 | 16357                | 2630525 | 24304     | 10920  | 1663611        | 714191  |
| 318217                            | 5286      | 1603   | 177301         | 48875  | 503                                | 42146 | 18052                | 2723607 | 27911     | 6710   | 1914064        | 440339  |
| 321218                            | 4368      | 3379   | 145263         | 102697 | 486                                | 41038 | 15720                | 2620577 | 21680     | 14105  | 1473488        | 924155  |
| 323189                            | 5267      | 1913   | 175573         | 56968  | 453                                | 42407 | 15753                | 2727163 | 26973     | 7970   | 1842651        | 520660  |
| 332259                            | 5305      | 1937   | 178157         | 58931  | 407                                | 43702 | 17516                | 2822003 | 27776     | 8299   | 1904545        | 545248  |

| abbreviation        |                 |       |                      |          | predicted length = 1 nucleotide |       |                      |       |           |        |                |        | predicted length <= 10 nucl |       |                      |       |       |
|---------------------|-----------------|-------|----------------------|----------|---------------------------------|-------|----------------------|-------|-----------|--------|----------------|--------|-----------------------------|-------|----------------------|-------|-------|
|                     | GlimmerHMM (#s) |       | GlimmerHMM (Lengths) |          | GlimmerHMM (#s)                 |       | GlimmerHMM (Lengths) |       | PASA (#s) |        | PASA (Lengths) |        | GlimmerHMM (#s)             |       | GlimmerHMM (Lengths) |       | PAS   |
|                     | Genes           | Exons | Genes                | Exons    | Genes                           | Exons | Genes                | Exons | Valid     | Failed | Valid          | Failed | Genes                       | Exons | Genes                | Exons | Valid |
| R.S1 (v1.0)         | 30871           | 74109 | 473787912            | 14430572 | 0                               | 3     | 0                    | 3     | 0         | 0      | 0              | 0      | 343                         | 2311  | 2288                 | 14293 | 178   |
| P.ecPB.32.gc (v2.0) | 42683           | 84499 | 126158109            | 29180337 | 0                               | 0     | 0                    | 0     | 0         | 0      | 0              | 0      | 5                           | 283   | 49                   | 1770  | 55    |
| S2.DUP              | 56689           | 96506 | 268082598            | 24620354 | 0                               | 0     | 0                    | 0     | 0         | 0      | 0              | 0      | 133                         | 934   | 889                  | 6033  | 19    |
| S2                  | 49104           | 89693 | 228939681            | 25339719 | 0                               | 0     | 0                    | 0     | 0         | 0      | 0              | 0      | 153                         | 886   | 992                  | 5671  | 48    |
| S2.ecPB.21          | 48805           | 55174 | 19800195             | 17469270 | 0                               | 0     | 0                    | 0     | 0         | 0      | 0              | 0      | 38                          | 41    | 228                  | 243   | 1     |
| S2.ecPB.32          | 49794           | 56236 | 20235698             | 17885517 | 0                               | 0     | 0                    | 0     | 0         | 0      | 0              | 0      | 30                          | 33    | 189                  | 201   | 1     |
| P                   | 37941           | 77774 | 149393202            | 24654768 | 0                               | 0     | 0                    | 0     | 0         | 0      | 0              | 0      | 19                          | 448   | 125                  | 2815  | 56    |
| P.ecPB.19           | 39096           | 78862 | 145710378            | 25404608 | 0                               | 0     | 0                    | 0     | 0         | 0      | 0              | 0      | 21                          | 464   | 130                  | 2958  | 55    |
| P.ecPB.21           | 38248           | 77893 | 150652290            | 24668484 | 0                               | 0     | 0                    | 0     | 0         | 0      | 0              | 0      | 11                          | 517   | 75                   | 3172  | 57    |
| P.ecPB.32           | 38334           | 78786 | 144880464            | 25392144 | 0                               | 0     | 0                    | 0     | 0         | 0      | 0              | 0      | 15                          | 440   | 98                   | 2760  | 64    |
| P.ecPB.36           | 36783           | 75516 | 144880464            | 25392144 | 0                               | 0     | 0                    | 0     | 0         | 0      | 0              | 0      | 22                          | 487   | 169                  | 3116  | 53    |
| P.ucPB              | 38717           | 78794 | 144328106            | 25049627 | 0                               | 0     | 0                    | 0     | 0         | 0      | 0              | 0      | 18                          | 387   | 118                  | 2444  | 49    |
| P.ucPB.gc           | 40838           | 81839 | 136545510            | 26929248 | 0                               | 0     | 0                    | 0     | 0         | 0      | 0              | 0      | 8                           | 314   | 56                   | 1947  | 39    |



| leotide |       |                | predicted length <= 50 nucleotide |       |                      |        |           |        |                |        | predicted length <= 100 nucleotide |       |                      |         |           |        |                |        |
|---------|-------|----------------|-----------------------------------|-------|----------------------|--------|-----------|--------|----------------|--------|------------------------------------|-------|----------------------|---------|-----------|--------|----------------|--------|
| A (#s)  |       | PASA (Lengths) | GlimmerHMM (#s)                   |       | GlimmerHMM (Lengths) |        | PASA (#s) |        | PASA (Lengths) |        | GlimmerHMM (#s)                    |       | GlimmerHMM (Lengths) |         | PASA (#s) |        | PASA (Lengths) |        |
| Failed  | Valid | Failed         | Genes                             | Exons | Genes                | Exons  | Valid     | Failed | Valid          | Failed | Genes                              | Exons | Genes                | Exons   | Valid     | Failed | Valid          | Failed |
| 277     | 1097  | 1717           | 1376                              | 12425 | 31257                | 329489 | 1442      | 2119   | 43073          | 62276  | 2110                               | 29995 | 85898                | 1657523 | 5783      | 8204   | 379544         | 532693 |
| 21      | 335   | 141            | 60                                | 2548  | 1891                 | 79566  | 742       | 200    | 25626          | 6291   | 173                                | 13087 | 10581                | 905953  | 7016      | 1343   | 525975         | 97014  |
| 91      | 136   | 592            | 907                               | 6820  | 24287                | 198018 | 261       | 1347   | 9045           | 46361  | 1772                               | 21978 | 88487                | 1358458 | 1833      | 10476  | 133098         | 766607 |
| 107     | 314   | 719            | 826                               | 5953  | 21003                | 169956 | 572       | 978    | 18573          | 30250  | 1642                               | 19627 | 82445                | 1224231 | 3991      | 5785   | 289538         | 409182 |
| 1       | 6     | 6              | 441                               | 510   | 14865                | 17589  | 51        | 43     | 2047           | 1716   | 3740                               | 5168  | 281733               | 395076  | 721       | 890    | 56566          | 70851  |
| 0       | 6     | 0              | 367                               | 437   | 12667                | 15461  | 48        | 44     | 1930           | 1790   | 3698                               | 5131  | 282342               | 396039  | 705       | 899    | 55610          | 71659  |
| 57      | 324   | 332            | 103                               | 3466  | 2692                 | 103096 | 746       | 489    | 25324          | 14611  | 267                                | 14628 | 15193                | 973591  | 6225      | 2610   | 462138         | 181108 |
| 73      | 335   | 462            | 139                               | 3374  | 3883                 | 99509  | 647       | 532    | 21809          | 15722  | 316                                | 14272 | 17479                | 950027  | 5817      | 3039   | 433022         | 212963 |
| 92      | 351   | 571            | 132                               | 3641  | 3653                 | 106017 | 663       | 652    | 22281          | 19328  | 301                                | 14615 | 16653                | 961438  | 5748      | 3375   | 427637         | 232851 |
| 50      | 397   | 331            | 113                               | 3367  | 3048                 | 100048 | 743       | 386    | 25420          | 11681  | 269                                | 14391 | 14759                | 960162  | 6556      | 2051   | 487815         | 143491 |
| 76      | 334   | 486            | 120                               | 3754  | 3129                 | 111711 | 653       | 765    | 22356          | 23737  | 273                                | 14995 | 14645                | 984574  | 5107      | 4223   | 376203         | 295495 |
| 48      | 293   | 316            | 117                               | 3279  | 3192                 | 99246  | 713       | 422    | 24670          | 12806  | 245                                | 14454 | 13250                | 972087  | 6272      | 2474   | 468186         | 174500 |
| 33      | 247   | 198            | 81                                | 2932  | 2355                 | 90908  | 707       | 399    | 25092          | 12669  | 202                                | 13818 | 12107                | 942511  | 6419      | 2377   | 481125         | 167951 |

| abbreviation        |                 |        |                      |         | predicted length = 1 nucleotide |       |                      |       |           |        |                |        | predicted length <= 10 nucleotide |       |                      |       |           |        |         |
|---------------------|-----------------|--------|----------------------|---------|---------------------------------|-------|----------------------|-------|-----------|--------|----------------|--------|-----------------------------------|-------|----------------------|-------|-----------|--------|---------|
|                     | GlimmerHMM (#s) |        | GlimmerHMM (Lengths) |         | GlimmerHMM (#s)                 |       | GlimmerHMM (Lengths) |       | PASA (#s) |        | PASA (Lengths) |        | GlimmerHMM (#s)                   |       | GlimmerHMM (Lengths) |       | PASA (#s) |        | PASA (L |
|                     | Genes           | Exons  | Genes                | Exons   | Genes                           | Exons | Genes                | Exons | Valid     | Failed | Valid          | Failed | Genes                             | Exons | Genes                | Exons | Valid     | Failed | Valid   |
| R.S1 (v1.0)         | 54500           | 97841  | 4.3E+08              | 1.8E+07 | 148                             | 185   | 148                  | 185   | 0         | 0      | 0              | 0      | 603                               | 3464  | 3177                 | 20146 | 243       | 459    | 1555    |
| P.ecPB.32.gc (v2.0) | 78021           | 115562 | 1.1E+08              | 3.6E+07 | 0                               | 66    | 0                    | 66    | 1         | 0      | 1              | 0      | 66                                | 556   | 130                  | 3057  | 120       | 47     | 762     |
| S2.DUP              | 114527          | 153380 | 2.3E+08              | 3.7E+07 | 139                             | 179   | 139                  | 179   | 0         | 0      | 0              | 0      | 303                               | 1623  | 1244                 | 9141  | 27        | 200    | 174     |
| S2                  | 93737           | 132158 | 2E+08                | 3.5E+07 | 169                             | 204   | 169                  | 204   | 0         | 0      | 0              | 0      | 340                               | 1608  | 1329                 | 8958  | 117       | 232    | 751     |
| S2.ecPB.21          | 77294           | 84692  | 2.5E+07              | 2.3E+07 | 559                             | 568   | 559                  | 568   | 1         | 3      | 1              | 3      | 661                               | 689   | 1274                 | 1403  | 10        | 9      | 61      |
| S2.ecPB.32          | 78991           | 86476  | 2.6E+07              | 2.3E+07 | 544                             | 555   | 544                  | 555   | 1         | 2      | 1              | 2      | 627                               | 657   | 1119                 | 1250  | 11        | 10     | 71      |
| P                   | 69929           | 106381 | 1.3E+08              | 3.1E+07 | 134                             | 140   | 134                  | 140   | 0         | 0      | 0              | 0      | 163                               | 956   | 328                  | 5125  | 109       | 124    | 682     |
| P.ecPB.19           | 71427           | 107756 | 1.2E+08              | 3.1E+07 | 45                              | 51    | 45                   | 51    | 0         | 0      | 0              | 0      | 67                                | 869   | 207                  | 4990  | 118       | 130    | 728     |
| P.ecPB.21           | 70084           | 106364 | 1.3E+08              | 3.1E+07 | 50                              | 64    | 50                   | 64    | 0         | 0      | 0              | 0      | 79                                | 1000  | 257                  | 5841  | 121       | 150    | 764     |
| P.ecPB.32           | 70608           | 107431 | 1.2E+08              | 3.1E+07 | 76                              | 85    | 76                   | 85    | 1         | 0      | 1              | 0      | 100                               | 868   | 234                  | 5001  | 134       | 82     | 864     |
| P.ecPB.36           | 67855           | 103858 | 1.3E+08              | 2.9E+07 | 45                              | 52    | 45                   | 52    | 0         | 1      | 0              | 1      | 71                                | 937   | 231                  | 5596  | 100       | 172    | 613     |
| P.ucPB              | 72000           | 108702 | 1.2E+08              | 3.1E+07 | 67                              | 76    | 67                   | 76    | 0         | 1      | 0              | 1      | 92                                | 833   | 247                  | 4734  | 129       | 90     | 798     |
| P.ucPB.gc           | 75114           | 112381 | 1.2E+08              | 3.3E+07 | 33                              | 44    | 33                   | 44    | 0         | 1      | 0              | 1      | 43                                | 677   | 107                  | 3948  | 119       | 77     | 736     |

|          | predicted length <= 50 nucleotide |       |                      |        |           |        |                |        | predicted length <= 100 nucleotide |       |                      |         |           |        |                |        |
|----------|-----------------------------------|-------|----------------------|--------|-----------|--------|----------------|--------|------------------------------------|-------|----------------------|---------|-----------|--------|----------------|--------|
| Lengths) | GlimmerHMM (#s)                   |       | GlimmerHMM (Lengths) |        | PASA (#s) |        | PASA (Lengths) |        | GlimmerHMM (#s)                    |       | GlimmerHMM (Lengths) |         | PASA (#s) |        | PASA (Lengths) |        |
| Failed   | Genes                             | Exons | Genes                | Exons  | Valid     | Failed | Valid          | Failed | Genes                              | Exons | Genes                | Exons   | Valid     | Failed | Valid          | Failed |
| 2862     | 1862                              | 16063 | 37773                | 407084 | 1901      | 2914   | 57170          | 83268  | 2788                               | 37081 | 107490               | 2005806 | 7108      | 9993   | 460903         | 630127 |
| 302      | 141                               | 3857  | 2544                 | 115861 | 1237      | 325    | 41353          | 9807   | 340                                | 17382 | 18369                | 1170784 | 9021      | 1705   | 658050         | 118323 |
| 1238     | 1163                              | 9224  | 27025                | 255843 | 366       | 2124   | 12203          | 70975  | 2338                               | 28647 | 115491               | 1749508 | 2286      | 12847  | 164734         | 915748 |
| 1467     | 1212                              | 8279  | 27355                | 225200 | 946       | 1589   | 29541          | 48212  | 2319                               | 25696 | 111480               | 1567929 | 5220      | 7549   | 366574         | 517553 |
| 40       | 1985                              | 2207  | 48461                | 56113  | 142       | 152    | 5194           | 5416   | 9307                               | 11896 | 629479               | 829282  | 1306      | 1604   | 99113          | 123559 |
| 48       | 1917                              | 2148  | 47265                | 55149  | 137       | 159    | 4880           | 5706   | 9263                               | 11877 | 630691               | 831311  | 1301      | 1618   | 98816          | 124031 |
| 770      | 317                               | 5252  | 4694                 | 146697 | 1205      | 848    | 40134          | 24675  | 567                                | 19164 | 23802                | 1227977 | 7908      | 3455   | 571511         | 228602 |
| 797      | 213                               | 5058  | 4752                 | 143087 | 1132      | 861    | 37029          | 24857  | 457                                | 18710 | 23691                | 1206458 | 7470      | 3916   | 540496         | 265242 |
| 977      | 193                               | 5252  | 3544                 | 146627 | 1043      | 975    | 34482          | 28504  | 429                                | 19104 | 21680                | 1223274 | 7262      | 4338   | 527553         | 291587 |
| 510      | 232                               | 4992  | 4315                 | 142129 | 1222      | 577    | 39916          | 17371  | 462                                | 18903 | 22056                | 1223364 | 8409      | 2604   | 608198         | 176624 |
| 1048     | 213                               | 5463  | 4430                 | 154569 | 1005      | 1256   | 33439          | 37757  | 435                                | 19666 | 21462                | 1259239 | 6552      | 5532   | 473329         | 372864 |
| 575      | 233                               | 4982  | 4334                 | 141844 | 1191      | 647    | 39052          | 19491  | 470                                | 19017 | 23024                | 1233823 | 8027      | 3135   | 581825         | 213970 |
| 461      | 132                               | 4421  | 2984                 | 129634 | 1156      | 604    | 38194          | 17946  | 370                                | 18274 | 22125                | 1209139 | 8195      | 3081   | 596091         | 212526 |

Supplementary Table 3. Repeat element classification

| Repeat category                      | Sub-category                            | Number | Content (bases) | Content (% of genome assembly size) |
|--------------------------------------|-----------------------------------------|--------|-----------------|-------------------------------------|
| <b><i>Retrotransposons</i></b>       | <i>LTR retrotransposon</i>              |        |                 |                                     |
|                                      | Gypsy                                   | 16983  | 9699390         | 4.31                                |
|                                      | Copia                                   | 14183  | 9031714         | 4.01                                |
|                                      | Caulimovirus                            | 1298   | 919770          | 0.41                                |
|                                      | Unclassified                            | 19     | 8004            | 0.004                               |
|                                      | <i>Non-LTR retrotransposon</i>          |        |                 |                                     |
|                                      | LINEs                                   | 2428   | 845972          | 0.38                                |
|                                      | SINEs                                   | 0      | 0               | 0                                   |
| <b><i>DNA Transposons</i></b>        | <i>Terminal Inverted Repeats (TIRs)</i> |        |                 |                                     |
|                                      | MuLE-MuDR                               | 6261   | 2797241         | 1.24                                |
|                                      | hAT                                     | 1776   | 833096          | 0.37                                |
|                                      | PIF/Harbinger                           | 407    | 152389          | 0.07                                |
|                                      | En-Spm                                  | 2143   | 969277          | 0.43                                |
|                                      | others                                  | 80     | 4328            | 0.002                               |
| <b><i>MITEs</i></b>                  |                                         | 3782   | 707942          | 0.31                                |
| <b><i>RC/Helitron</i></b>            |                                         | 173    | 11906           | 0.005                               |
| <b><i>Unclassified Sequences</i></b> |                                         | 98680  | 30568122        | 13.58                               |
| <b><i>Simple repeats</i></b>         |                                         | 1297   | 284765          | 0.13                                |
| <b>Non redundant Repeat Content</b>  |                                         | N.A.   | <b>54375206</b> | <b>24.15</b>                        |

## Supplementary File 2.

### Scripts used in the study

#### 1. In silico normalization using Trinity utils

```
perl /Apps/Trinity/trinityrnaseq_r20140717/util/insilico_read_normalization.pl --seqType fq ---JM
10G --max_cov 5 --left s_1234_1.fastq --right s_1234_2.fastq --output s_1234 --CPU 12
```

#### 2. Assemble using SOAPdenovo 2.0

```
/Apps/SOAPdenovo2/SOAPdenovo2-src-r223/SOAPdenovo-63mer all -s config -K 31 -d 9 -F -R -
o 64 -p 12
```

config:

[LIB]

avg\_ins=350

reverse\_seq=0

asm\_flags=3

rd\_len\_cutoff=76

rank=1

pair\_num\_cutoff=3

map\_len=32

q1=/storage/fastqs/s\_1234\_1.fastq.normalized\_K25\_C50\_pctSD200.fq

q2=/storage/fastqs/s\_1234\_2.fastq.normalized\_K25\_C50\_pctSD200.fq

[LIB]

avg\_ins=350

reverse\_seq=0

asm\_flags=3

rd\_len\_cutoff=76

rank=2

pair\_num\_cutoff=3

map\_len=32

q1=/storage/fastqs/s\_567\_1.fastq.normalized\_K25\_C50\_pctSD200.fq

q2=/storage/fastqs/s\_567\_2.fastq.normalized\_K25\_C50\_pctSD200.fq

[LIB]

avg\_ins=1500

reverse\_seq=1

asm\_flags=3

rd\_len\_cutoff=36

rank=3

pair\_num\_cutoff=3

map\_len=32

q1=/storage/fastqs/s34\_1.fastq.normalized\_K25\_C50\_pctSD200.fq

q2=/storage/fastqs/s34\_2.fastq.normalized\_K25\_C50\_pctSD200.fq

[LIB]

avg\_ins=3000

reverse\_seq=1

asm\_flags=3

```
rd_len_cutoff=36
rank=4
pair_num_cutoff=3
map_len=32
q1=/storage/fastqs/s56_1.fastq.normalized_K25_C50_pctSD200.fq
q2=/storage/fastqs/s56_2.fastq.normalized_K25_C50_pctSD200.fq
```

```
[LIB]
avg_ins=4000
reverse_seq=1
asm_flags=3
rd_len_cutoff=100
rank=5
pair_num_cutoff=3
map_len=32
q1=/storage/fastqs/Az_3.5_4.5KB_R1.fastq.normalized_K25_C50_pctSD200.fq
q2=/storage/fastqs/Az_3.5_4.5KB_R2.fastq.normalized_K25_C50_pctSD200.fq
```

```
[LIB]
avg_ins=6000
reverse_seq=1
asm_flags=3
rd_len_cutoff=100
rank=6
pair_num_cutoff=3
map_len=32
q1=/storage/fastqs/Az_5_7KB_R1.fastq.normalized_K25_C50_pctSD200.fq
q2=/storage/fastqs/Az_5_7KB_R2.fastq.normalized_K25_C50_pctSD200.fq
```

```
[LIB]
avg_ins=10000
reverse_seq=1
asm_flags=3
rd_len_cutoff=100
rank=7
pair_num_cutoff=3
map_len=32
q1=/storage/fastqs/Az_8_11KB_R1.fastq.normalized_K25_C50_pctSD200.fq
q2=/storage/fastqs/Az_8_11KB_R2.fastq.normalized_K25_C50_pctSD200.fq
```

```
[LIB]
avg_ins=10000
reverse_seq=1
asm_flags=3
rd_len_cutoff=36
rank=8
pair_num_cutoff=3
map_len=32
q1=/storage/fastqs/10kb_R1.fastq_30012014_QC_passed.fastq.normalized_K25_C50_pctSD200.fq
q2=/storage/fastqs/10kb_R2.fastq_30012014_QC_passed.fastq.normalized_K25_C50_pctSD200.fq
```

```
[LIB]
```

```
avg_ins=350
reverse_seq=0
asm_flags=3
rd_len_cutoff=76
rank=9
pair_num_cutoff=3
map_len=32
q1=/storage/fastqs/hybrid.fasta_1_350_35_5.0_100.fq
q2=/storage/fastqs/hybrid.fasta_2_350_35_5.0_100.fq
```

### 3. Assemble using Platanus:

assemble:

```
/Apps/platanus assemble -o P.ecPB.32 -f
/storage/fastqs/s_1234_1.fastq.normalized_K25_C50_pctSD200.fq
/storage/fastqs/s_1234_2.fastq.normalized_K25_C50_pctSD200.fq
/storage/fastqs/s_567_1.fastq.normalized_K25_C50_pctSD200.fq
/storage/fastqs/s_567_2.fastq.normalized_K25_C50_pctSD200.fq
/storage/fastqs/hybrid_1_350_35_5.0_100.fq /storage/fastqs/hybrid_2_350_35_5.0_100.fq -k 32 -s
5 -t 12 -m 100
```

scaffold:

```
/Apps/platanus scaffold -o P.ecPB.32 -c P.ecPB.32_contig.fa -b P.ecPB.32_contigBubble.fa -IP1
/storage/fastqs/s_1234_1.fastq.normalized_K25_C50_pctSD200.fq
/storage/fastqs/s_1234_2.fastq.normalized_K25_C50_pctSD200.fq -IP2
/storage/fastqs/s_567_1.fastq.normalized_K25_C50_pctSD200.fq
/storage/fastqs/s_567_2.fastq.normalized_K25_C50_pctSD200.fq -IP3
/storage/fastqs/hybrid_1_350_35_5.0_100.fq /storage/fastqs/hybrid_2_350_35_5.0_100.fq -OP4
/storage/fastqs/s34_1.fastq.normalized_K25_C50_pctSD200.fq
/storage/fastqs/s34_2.fastq.normalized_K25_C50_pctSD200.fq -OP5
/storage/fastqs/s56_1.fastq.normalized_K25_C50_pctSD200.fq
/storage/fastqs/s56_2.fastq.normalized_K25_C50_pctSD200.fq -OP6
/storage/fastqs/10kb_R1.fastq_30012014_QC_passed.fastq.normalized_K25_C50_pctSD200.fq
/storage/fastqs/10kb_R2.fastq_30012014_QC_passed.fastq.normalized_K25_C50_pctSD200.fq -
OP7 /storage/fastqs/Az_3.5_4.5KB_R1.fastq.normalized_K25_C50_pctSD200.fq
/storage/fastqs/Az_3.5_4.5KB_R2.fastq.normalized_K25_C50_pctSD200.fq -OP8
/storage/fastqs/Az_5_7KB_R1.fastq.normalized_K25_C50_pctSD200.fq
/storage/fastqs/Az_5_7KB_R2.fastq.normalized_K25_C50_pctSD200.fq -OP9
/storage/fastqs/Az_8_11KB_R1.fastq.normalized_K25_C50_pctSD200.fq
/storage/fastqs/Az_8_11KB_R2.fastq.normalized_K25_C50_pctSD200.fq -n1 315 -n2 315 -n3 315
-n4 1350 -n5 2700 -n6 9000 -n7 3500 -n8 5000 -n9 8000 -a1 350 -a2 350 -a3 350 -a4 1500 -a5 3500
-a6 10000 -a7 4000 -a8 6000 -a9 9500 -d1 35 -d2 35 -d3 35 -d4 150 -d5 350 -d6 1000 -d7 400 -d8
600 -d9 950
```

gap-close:

```
/Apps/platanus gap_close -o P.ecPB.32.gc -c P.ecPB.32.scaffold.fa -IP1
/storage/fastqs/s_1234_1.fastq.normalized_K25_C50_pctSD200.fq
/storage/fastqs/s_1234_2.fastq.normalized_K25_C50_pctSD200.fq -IP2
/storage/fastqs/s_567_1.fastq.normalized_K25_C50_pctSD200.fq
```

```
/storage/fastqs/s_567_2.fastq.normalized_K25_C50_pctSD200.fq -IP3
/storage/fastqs/hybrid.fasta_1_350_35_5.0_100.fq
/storage/fastqs/hybrid.fasta_2_350_35_5.0_100.fq -OP4
/storage/fastqs/s34_1.fastq.normalized_K25_C50_pctSD200.fq
/storage/fastqs/s34_2.fastq.normalized_K25_C50_pctSD200.fq -OP5
/storage/fastqs/s56_1.fastq.normalized_K25_C50_pctSD200.fq
/storage/fastqs/s56_2.fastq.normalized_K25_C50_pctSD200.fq -OP6
/storage/fastqs/10kb_R1.fastq_30012014_QC_passed.fastq.normalized_K25_C50_pctSD200.fq
/storage/fastqs/10kb_R2.fastq_30012014_QC_passed.fastq.normalized_K25_C50_pctSD200.fq -
OP7 /storage/fastqs/Az_3.5_4.5KB_R1.fastq.normalized_K25_C50_pctSD200.fq
/storage/fastqs/Az_3.5_4.5KB_R2.fastq.normalized_K25_C50_pctSD200.fq -OP8
/storage/fastqs/Az_5_7KB_R1.fastq.normalized_K25_C50_pctSD200.fq
/storage/fastqs/Az_5_7KB_R2.fastq.normalized_K25_C50_pctSD200.fq -OP9
/storage/fastqs/Az_8_11KB_R1.fastq.normalized_K25_C50_pctSD200.fq
/storage/fastqs/Az_8_11KB_R2.fastq.normalized_K25_C50_pctSD200.fq -t 1 &
```

#### 4. SINC to generate Illumina-like 100bp reads with 350±35 bp insert size from PacBio reads

```
/Apps/SInC/SInC_readGen -D 350 -S 35 -C 5 -T 10 -R 100 hybrid.fasta
/Apps/SInC/100_bp_read_1_profile.txt /Apps/SInC/100_bp_read_2_profile.txt 1> sinc.log 2>&1
```

#### 5. LoRDEC to error-correct PacBio reads using Illumina libraries

```
/Apps/LoRDEC-0.4.1/lordec-correct -T 4 -i /storage/fastqs/filtered_subreads.fastq -2
s_1234_1.fastq s_1234_2.fastq s_567_1.fastq s_567_2.fastq -k 19 -o hybrid -s 3
```

#### 6. Assembly QC using QUAST

```
python quast.py -t 4 --scaffolds P.ecPB.32.gc.fa
```

#### 7. Transcriptome Assembly using Trinity

```
/Apps/Trinity/trinityrnaseq_r20140717/Trinity --seqType fq --JM 5G --CPU 10 --
min_contig_length 72 --trimmomatic --quality_trimming_params "LEADING:20 TRAILING:20
MINLEN:36" --left ../fastqs/flower_index5_ACAGTG_L007_R1_001.fastq
../fastqs/fruit_index2_CGATGT_L007_R1_001.fastq
../fastqs/leaf_index4_TGACCA_L007_R1_001.fastq
../fastqs/root_index6_GCCAAT_L007_R1_001.fastq
../fastqs/stem_index7_CAGATC_L007_R1_001.fastq --right
../fastqs/flower_index5_ACAGTG_L007_R2_001.fastq
../fastqs/fruit_index2_CGATGT_L007_R2_001.fastq
../fastqs/leaf_index4_TGACCA_L007_R2_001.fastq
../fastqs/root_index6_GCCAAT_L007_R2_001.fastq
../fastqs/stem_index7_CAGATC_L007_R2_001.fastq --output 5organs_combined_forDE
```

#### 8. Mapping genome to transcriptome using PASA

```
sed 's/ path=[.*]$/g' Trinity.fasta | sed 's/[ =]/_g' > Trinity_headerMod.fasta
/Apps/PASA_r20140417/seqclean/seqclean/seqclean Trinity_headerMod.fasta
/Apps/PASA_r20140417/scripts/Launch_PASA_pipeline.pl -c alignAssembly.config -C -R -g
P.ecPB.32.gc.fa -t Trinity_headerMod.fasta.clean -T -u Trinity_headerMod.fasta --ALIGNERS
gmap --CPU 12 1>pasa.out 2>pasa.err &
```



## 9. Training set creation and Gene prediction using GlimmerHMM-Train and GlimmerHMM

# training with *C. sinensis*

# formatting exon file for input to trainGlimmerHMM

```
egrep "exon|mRNA" Csinensis_154_gene_exons.gff3 |cut -f 1,3,4,5,7 | sed 's/.*\tmRNA\t.*//|awk -F"\t" '{if($5=="-") {print $1"\t"$4"\t"$3;} else {print $1"\t"$3"\t"$4}}' | sed 1d > Csinensis_154_gene_exons_forGlimmerHMM.tsv
/Apps/GlimmerHMM/GlimmerHMM3.0.4/train/trainGlimmerHMM Csinensis_154.fa Csinensis_154_gene_exons_forGlimmerHMM.tsv -d Csinensis.glimmerTraining
```

# training with *C. clementina*

# formatting exon file for input to trainGlimmerHMM

```
egrep "exon|mRNA" Cclementina_182_v1.0.gene_exons.gff3 |cut -f 1,3,4,5,7 | sed 's/.*\tmRNA\t.*//|awk -F"\t" '{if($5=="-") {print $1"\t"$4"\t"$3;} else {print $1"\t"$3"\t"$4}}' | sed 1d > Cclementina_182_v1.0.gene_exons_forGlimmerHMM.tsv
/Apps/GlimmerHMM/GlimmerHMM3.0.4/train/trainGlimmerHMM Cclementina_182_v1.fa Cclementina_182_v1.0.gene_exons_forGlimmerHMM.tsv -d Cclementina.glimmerTraining
```

# running GlimmerHMM with Arabidopsis

```
/Apps/GlimmerHMM/GlimmerHMM3.0.4_mod/bin/glimmhmm.pl
/Apps/GlimmerHMM/GlimmerHMM3.0.4_mod/bin/glimmerhmm_linux_x86_64 P.ecPB.32.gc.fa
/Apps/GlimmerHMM/GlimmerHMM3.0.4_mod/trained_dir/arabidopsis -g > P.ecPB.32.gc.arabidopsis.glimmerhmm.txt 2>glimmer.arabidopsis.err
```

# running GlimmerHMM with *C. sinensis*

```
/Apps/GlimmerHMM/GlimmerHMM3.0.4_mod/bin/glimmhmm.pl
/Apps/GlimmerHMM/GlimmerHMM3.0.4_mod/bin/glimmerhmm_linux_x86_64 P.ecPB.32.gc.fa Csinensis.glimmerTraining -g > P.ecPB.32.gc.csinensis.glimmerhmm.txt 2>glimmer.csinensis.err
```

# running GlimmerHMM with *C. clementina*

```
/Apps/GlimmerHMM/GlimmerHMM3.0.4_mod/bin/glimmhmm.pl
/Apps/GlimmerHMM/GlimmerHMM3.0.4_mod/bin/glimmerhmm_linux_x86_64 P.ecPB.32.gc.fa Cclementina.glimmerTraining -g > P.ecPB.32.gc.cclelementina.glimmerhmm.txt 2>glimmer.cclelementina.err
```

## 10. Repeat analyses pipeline

# Mite-hunter

```
perl /Apps/MITE_Hunter/MITE_Hunter_manager.pl -i P.ecPB.32.gc.fa -g AZ -S 12345678 -c 12
```

# transposon-PSI

```
nohup /Apps/TransposonPSI_08222010/transposonPSI.pl P.ecPB.32.gc.fa nuc
```

# LTR\_finder

```
nohup /Apps/ltrFinder_1.0.5/ltr_finder -w 0 P.ecPB.32.gc.fa > P.ecPB.32.gc.ltrFinder1.log 2>
P.ecPB.32.gc.err
```

```
egrep "^\^[35]'-LTR|^\^TSR" P.ecPB.32.gc.ltrFinder.log | sed 's/ Len:.*//;s/.*: //;s/^\^[0-9][0-9]*\]
//;s/ - .* , .* - \([0-9][0-9]*\) \[.*\t1/;s/ - \t/' | awk '{if(FNR%4==1) {scaf=$1} else if(FNR%4==2)
{start1=$1-1;end1=$2} else if(FNR%4==3) {start2=$1-1;end2=$2} else {if($0!~/NOT FOUND/)
{start1=$1-1; end2=$2;} print scaf"\t"start1"\t"end1"\n"scaf"\t"start2"\t"end2}}' >
P.ecPB.32.gc.ltrFinder.bed
fastaFromBed -fi P.ecPB.32.gc.fa -bed P.ecPB.32.gc.ltrFinder.bed -fo P.ecPB.32.gc.ltrOut.fa
```

# RepeatModeler

```
perl /Apps/RepeatModeler/BuildDatabase -name P.ecPB.32.gc P.ecPB.32.gc.fa
perl /Apps/RepeatModeler/RepeatModeler -engine ncbi -database P.ecPB.32.gc 1>> run.log 2>&1
```

# RepeatMasker

```
nohup /Apps/RepeatMasker/RepeatMasker -s -nolow -gff -no_is -norna -pa 16 -lib allRepeats.fa
P.ecPB.32.gc.fa 1>rm.P.ecPB.32.gc.log 2>&1
```

# RepeatClassifier

```
/Apps/RepeatModeler/RepeatClassifier -consensi allRepeats.fa
```
